# Supplementary material for: Cu(0) onto sulfonic acid functionalized silica/carbon composites as bifunctional heterogeneous catalysts for the synthesis of polysubstituted pyridines and nitriles under benign reaction media
Source: Royal Society of Chemistry journal article supplement (doi:10.1039/c6ra19840f), 2016-01-01
Supplement: c6ra19840f1.pdf [file c6ra19840f1.pdf]

## Electronic Supplementary Information (ESI)

### **Cu(0) onto sulfonic acid functionalized silica/carbon composites as bifunctional heterogeneous catalysts for the synthesis of polysubstituted pyridines and nitriles under benign reaction media**

Madhvi Bhardwaj<sup>a</sup>, Manmeet Kour<sup>a</sup> and Satya Paul<sup>a\*</sup>

<sup>a</sup>*Department of Chemistry, University of Jammu, Jammu 180006, India. Fax: +91-191-2431365; Tel: +91-191-2453969; \*Email: pual7@rediffmail.com.*

#### **List of contents**

1. Fig. S1 XPS of the recovered catalyst.....Page 2
2. Table S1 Comparison of the e-factor for the Cu(0)-SiI<sub>C<sub>cell</sub></sub>-SO<sub>3</sub>H catalyzed synthesis of polysubstituted pyridines and nitriles with reported protocols in the literature....Page 3-4
3. Spectral data of synthesized compounds listed in Table 6 and Table 8.....Page 5-15
4. Copies of <sup>1</sup>H, D<sub>2</sub>O and <sup>13</sup>C NMR spectra of selected compounds.....Page 16-37
5. References.....Page 38

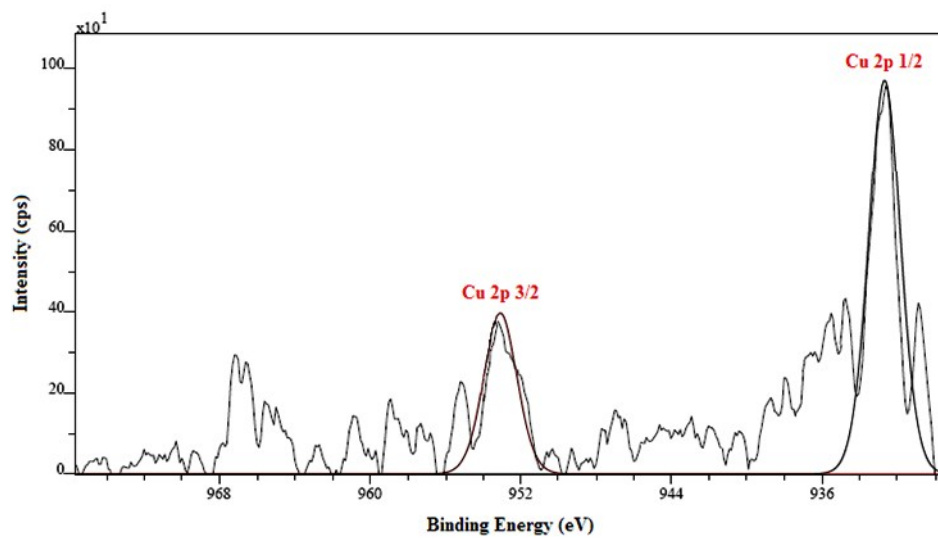

**Fig. S1** XPS of the recovered Cu(0)-SiIC<sub>cell</sub>-SO<sub>3</sub>H after 6<sup>th</sup> run.

**Table S1** Comparison of the e-factor for the Cu(0)-SiI<sub>C<sub>cell</sub></sub>-SO<sub>3</sub>H catalyzed synthesis of polysubstituted pyridines and nitriles with reported protocols in the literature

| Entry                  | Catalyst                                                                       | E-factor (kg waste/kg Product) <sup>c</sup> | Reference                                 |
|------------------------|--------------------------------------------------------------------------------|---------------------------------------------|-------------------------------------------|
| Pyridines <sup>a</sup> | FeCl <sub>3</sub><br>(Homogeneous)                                             | 9.81                                        | <i>J. Org. Chem.</i> , 2014, 79, 8882     |
|                        | SnCl <sub>2</sub> .2H <sub>2</sub> O<br>(Homogeneous)                          | 14.21                                       | <i>Tetrahedron Lett.</i> , 2015, 46, 4586 |
|                        | <b>Cu(0)-SiI<sub>C<sub>cell</sub></sub>-SO<sub>3</sub>H</b><br>(Heterogeneous) | <b>0.19</b>                                 | <i>Present work</i>                       |
| Nitriles <sup>b</sup>  | Cu(OTf) <sub>2</sub> /Bipy<br>(Homogeneous)                                    | 32.4                                        | <i>Chem. Commun.</i> , 2013, 49, 6030     |
|                        | Polymer-PhI(OAc) <sub>2</sub><br>(Heterogeneous)                               | 26.4                                        | <i>Synthesis</i> , 2010, 3121             |
|                        | <b>Cu(0)-SiI<sub>C<sub>cell</sub></sub>-SO<sub>3</sub>H</b><br>(Heterogeneous) | <b>11</b>                                   | <i>Present work</i>                       |

<sup>a</sup>Reaction using benzaldehyde, malononitrile, ethyl acetoacetate and aniline as substrates.

<sup>b</sup>Reaction using benzaldehyde as substrate.

<sup>c</sup>Amount of recyclable catalysts are excluded from the calculation part as per R. A. Sheldon guidelines.

### E-factor calculations

#### *J. Org. Chem.*, 2014, 79, 8882 (Homogeneous catalyst)

$$E = 0.106 \text{ g (benzaldehyde)} + 0.066 \text{ g (malanitrile)} + 0.130 \text{ g (ethylacetoacetate)} + 0.09 \text{ g (aniline)} + 0.08 \text{ g (FeCl}_3\text{)} + 2.34 \text{ g (ethanol)} - 0.26 \text{ g (product} \times \text{yield)}/0.26 \text{ g} \\ = 9.81$$

#### *Tetrahedron Lett.*, 2015, 46, 4586 (Homogeneous catalyst)

$$E = 0.106 \text{ g (benzaldehyde)} + 0.066 \text{ g (malanitrile)} + 0.130 \text{ g (ethylacetoacetate)} + 0.09 \text{ g (aniline)} + 0.02 \text{ g (SnCl}_2\text{.2H}_2\text{O)} + 4.0 \text{ g (water)} - 0.29 \text{ g (product} \times \text{yield)}/0.29 \text{ g} \\ = 14.21$$

***Present work (Heterogeneous catalyst)***

$$E = 0.106 \text{ g (benzaldehyde)} + 0.066 \text{ g (malanonitrle)} + 0.130 \text{ g (ethylacetoacetate)} + 0.09 \text{ g (aniline)} - 0.328 \text{ g (product} \times \text{yield)/0.328 g} \\ = 0.19$$

***Chem. Commun., 2013, 49, 6030 (Homogeneous catalyst)***

$$E = 0.318 \text{ g (benzaldehyde)} + 0.519 \text{ g (TEMPO-OH)} + 0.91 \text{ g (aqueous NH}_3\text{)} + 0.02 \text{ g (NaOH)} + 7.8 \text{ g (CH}_3\text{CN)} + 0.11 \text{ g [Cu(OTf)}_2\text{]} + 0.046 \text{ g (bipyridine)} - 0.29 \text{ g (product} \times \text{yield)/0.29 g} \\ = 32.48$$

***Synthesis, 2010, 3121 (Heterogeneous catalyst)***

$$E = 0.106 \text{ g (benzaldehyde)} + 2.31 \text{ g (NH}_4\text{OAc)} + 0.06 \text{ g (SDS)} - 0.09 \text{ g (product} \times \text{yield)/0.09 g} \\ = 26.4$$

***Present work (Heterogeneous catalyst)***

$$E = 0.106 \text{ g (benzaldehyde)} + 0.91 \text{ g (aqueous NH}_3\text{)} + 0.11 \text{ g (H}_2\text{O}_2\text{)} - 0.09 \text{ g (product} \times \text{yield)/0.09 g} \\ = 11$$

### 3. Spectral data of synthesized compounds listed in Table 6

#### *Ethyl 5-cyano-2-methyl-4-phenyl-6-(phenylamino)nicotinate (5a)*

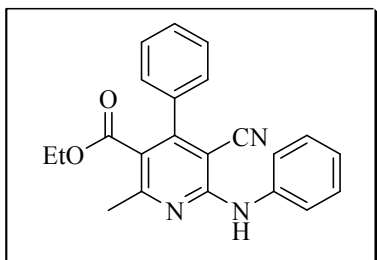

White solid; m.p./lit. m.p. 203-205/205-206 °C<sup>1</sup>; IR (KBr): 3344 (N-H stretch), 3064 (aromatic C-H stretch), 2222 (CN stretch), 1707 (C=O stretch) cm<sup>-1</sup>; <sup>1</sup>H NMR (400 MHz, CDCl<sub>3</sub>): δ 0.88-0.91 (t, 3H, *J* = 8 Hz, CH<sub>3</sub>), 2.62 (s, 3H, CH<sub>3</sub>), 3.97-4.02 (q, 2H, OCH<sub>2</sub>), 7.15-7.19 (t, 1H, *J* = 8 Hz, H<sub>arom</sub>), 7.26 (bs, 1H, NH, exchangeable with D<sub>2</sub>O), 7.39-7.43 (m, 4H, H<sub>arom</sub>), 7.49-7.50 (m, 3H, H<sub>arom</sub>), 7.69-7.71 (d, 2H, *J* = 8 Hz, H<sub>arom</sub>); <sup>13</sup>C NMR (100 MHz, CDCl<sub>3</sub>): δ 13.4, 23.8, 61.3, 90.8, 115.9, 120.5, 120.7, 124.0, 127.9, 128.6, 128.9, 129.5, 135.9, 138.3, 154.0, 155.4, 160.3, 167.2; ESI-MS: *m/z* = 358 (M)<sup>+</sup>.

#### *Ethyl 5-cyano-2-methyl-6-(phenylamino)-4-(p-tolyl)nicotinate (5b)*

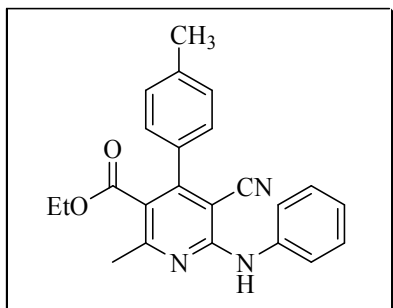

White solid; m.p./lit. m.p. 210-212/211-212 °C<sup>1</sup>; IR (KBr): 3342 (N-H stretch), 3054 (aromatic C-H stretch), 2222 (CN stretch), 1704 (C=O stretch) cm<sup>-1</sup>; <sup>1</sup>H NMR (400 MHz, CDCl<sub>3</sub>): δ 0.86-0.89 (t, 3H, *J* = 8 Hz, CH<sub>3</sub>), 2.38 (s, 3H, CH<sub>3</sub>), 2.55 (s, 3H, CH<sub>3</sub>), 3.97-4.02 (q, 2H, OCH<sub>2</sub>), 7.18-7.25 (m, 4H, H<sub>arom</sub>), 7.08-7.13 (m, 1H, H<sub>arom</sub>), 7.24 (bs, 1H, NH, exchangeable with D<sub>2</sub>O), 7.34-7.38 (t, 2H, *J* = 8 Hz, H<sub>arom</sub>), 7.65-7.67 (d, 2H, *J* = 8 Hz, H<sub>arom</sub>); <sup>13</sup>C NMR (100 MHz, CDCl<sub>3</sub>): δ 13.5, 21.3, 23.8, 90.9, 116.0, 120.7, 127.9, 128.5, 128.9, 129.3, 130.9, 132.9, 138.4, 139.6, 146.3, 159.7, 160.0, 167.4; ESI-MS: *m/z* = 372 (M)<sup>+</sup>.

***Ethyl 5-cyano-4-(4-methoxyphenyl)-2-methyl-6-(phenylamino)nicotinate (5c)***

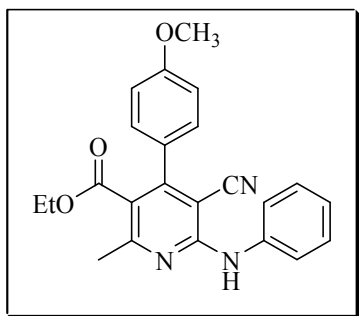

White solid; 178-179/179-180 °C<sup>1</sup>; IR (KBr): 3317 (N-H stretch), 3068 (aromatic C-H stretch), 2220 (CN stretch), 1712, (C=O stretch) cm<sup>-1</sup>; <sup>1</sup>H NMR (400 MHz, CDCl<sub>3</sub>): δ 0.93-0.96 (t, 3H, *J* = 8 Hz, CH<sub>3</sub>), 2.70 (s, 3H, CH<sub>3</sub>), 3.80 (s, 3H, OCH<sub>3</sub>), 4.00-4.05 (q, 2H, OCH<sub>2</sub>), 6.95-6.97 (d, 3H, *J* = 8 Hz, H<sub>arom</sub>), 7.04-7.06 (d, 2H, *J* = 8 Hz, H<sub>arom</sub>), 7.16 (bs, 1H, NH, exchangeable with D<sub>2</sub>O), 7.23-7.26 (t, 2H, *J* = 8 Hz, H<sub>arom</sub>), 7.55-7.56 (d, 2H, *J* = 4 Hz, H<sub>arom</sub>); <sup>13</sup>C NMR (100 MHz, CDCl<sub>3</sub>): δ 13.7, 23.8, 55.3, 61.4, 88.0, 110.0, 113.6, 115.0, 120.8, 123.6, 127.6, 129.0, 131.4, 141.1, 144.6, 159.7, 162.6, 165.1; ESI-MS: *m/z* = 388 (M)<sup>+</sup>.

***Ethyl 4-(4-bromophenyl)-5-cyano-2-methyl-6-(phenylamino)nicotinate (5d)***

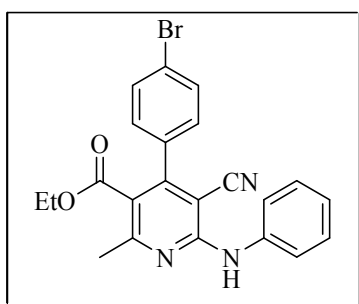

Pale Yellow solid; 175-177/176-178 °C<sup>1</sup>; IR (KBr): 3329 (N-H stretch), 3068 (aromatic C-H stretch) 2216 (CN stretch), 1714 (C=O stretch) cm<sup>-1</sup>; <sup>1</sup>H NMR (400 MHz, CDCl<sub>3</sub>): δ 1.01-1.05 (t, 3H, *J* = 8 Hz, CH<sub>3</sub>), 2.34 (s, 3H, CH<sub>3</sub>), 4.02-4.07 (q, 2H, OCH<sub>2</sub>), 7.06-7.17 (m, 3H, H<sub>arom</sub>), 7.20 (bs, 1H, NH, exchangeable with D<sub>2</sub>O), 7.26-7.30 (t, 2H, *J* = 8 Hz, H<sub>arom</sub>), 7.46-7.48 (d, 2H, *J* = 8 Hz, H<sub>arom</sub>), 7.65-7.67 (d, 2H, *J* = 8 Hz, H<sub>arom</sub>); <sup>13</sup>C NMR (100 MHz, CDCl<sub>3</sub>): δ 14.0, 21.0, 60.0, 88.0, 113.3, 114.6, 122.9, 123.5, 126.6, 129.8, 131.5, 131.7, 132.4, 134.7, 135.2, 136.8, 137.0, 155.3, 168.4; ESI-MS: *m/z* = 438 (M)<sup>+</sup>, 440 (M+2)<sup>+</sup>.

***Ethyl 4-(4-chlorophenyl)-5-cyano-2-methyl-6-(phenylamino)-nicotinate (5e)***

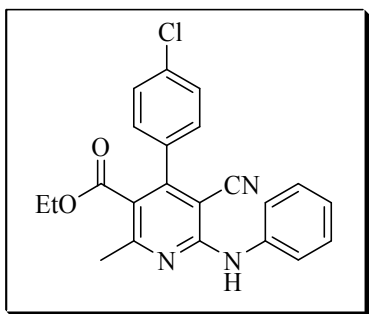

Yellow solid; 190-192/192-194 °C<sup>1</sup>; IR (KBr): 3331 (N-H stretch), 3069 (aromatic C-H stretch), 2216 (CN stretch), 1714 (C=O stretch) cm<sup>-1</sup>; <sup>1</sup>H NMR (400 MHz, CDCl<sub>3</sub>): δ 0.96-1.0 (t, 3H, *J* = 8 Hz, CH<sub>3</sub>), 2.31 (s, 3H, CH<sub>3</sub>), 4.01-4.06 (q, 2H, OCH<sub>2</sub>), 7.04-7.15 (m, 3H, H<sub>arom</sub>), 7.18-7.22 (t, 2H, *J* = 8 Hz, H<sub>arom</sub>), 7.24 (bs, 1H, NH, exchangeable with D<sub>2</sub>O), 7.38-7.40 (d, 2H, *J* = 8 Hz, H<sub>arom</sub>), 7.62-7.64 (d, 2H, *J* = 8 Hz, H<sub>arom</sub>); <sup>13</sup>C NMR (100 MHz, CDCl<sub>3</sub>): δ 13.6, 23.9, 61.4, 90.6, 115.9, 120.8, 124.2, 129.0, 129.4, 134.3, 135.8, 138.2, 152.7, 155.4, 160.6, 167.0; ESI-MS: *m/z* = 392 (M)<sup>+</sup>, 394 (M+2)<sup>+</sup>.

***Ethyl 5-cyano-2-methyl-4-(2-nitrophenyl)-6-(phenylamino)nicotinate (5f)***

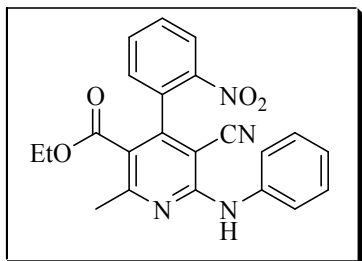

Yellow solid; 186-188/187-189 °C<sup>1</sup>; IR (KBr): 3361 (N-H stretch), 3058 (aromatic C-H stretch), 2216 (CN stretch), 1708 (C=O stretch) cm<sup>-1</sup>; <sup>1</sup>H NMR (400 MHz, CDCl<sub>3</sub>): δ 0.94-0.98 (t, 3H, *J* = 8 Hz, CH<sub>3</sub>), 2.73 (s, 3H, CH<sub>3</sub>), 4.01-4.07 (q, 2H, OCH<sub>2</sub>), 7.19-7.23 (m, 1H, H<sub>arom</sub>), 7.25 (bs, 1H, NH, exchangeable with D<sub>2</sub>O), 7.34-7.38 (t, 1H, *J* = 8 Hz, H<sub>arom</sub>), 7.46-7.50 (t, 2H, *J* = 8 Hz, H<sub>arom</sub>), 7.73-7.84 (m, 4H, H<sub>arom</sub>), 8.36-8.38 (m, 1H, H<sub>arom</sub>); <sup>13</sup>C NMR (100 MHz, CDCl<sub>3</sub>): 13.6, 24.3, 61.6, 90.5, 115.3, 119.8, 121.0, 123.2, 124.3, 124.5, 129.0, 134.1, 137.5, 137.9, 148.1, 151.4, 155.4, 161.6, 166.4; ESI-MS: *m/z* = 403 (M)<sup>+</sup>.

***Ethyl 5-cyano-2-methyl-4-(4-nitrophenyl)-6-(phenylamino)nicotinate (5g)***

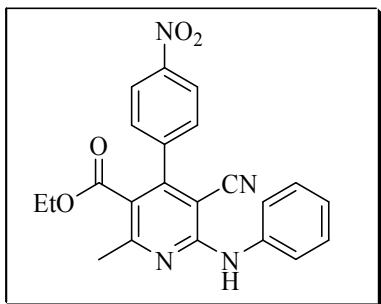

Yellow solid; 219-221/220-221 °C<sup>1</sup>; IR (KBr): 3327 (N-H stretch), 3055 (aromatic C-H stretch), 2221 (CN stretch), 1712 (C=O stretch) cm<sup>-1</sup>; <sup>1</sup>H NMR (400 MHz, CDCl<sub>3</sub>): δ 0.94-0.98 (t, 3H, *J* = 8 Hz, CH<sub>3</sub>), 2.65 (s, 3H, CH<sub>3</sub>), 4.0-4.05 (q, 2H, OCH<sub>2</sub>), 7.18-7.22 (t, 1H, *J* = 8 Hz, H<sub>arom</sub>), 7.29 (bs, 1H, NH, exchangeable with D<sub>2</sub>O), 7.40-7.44 (t, 2H, *J* = 8 Hz, H<sub>arom</sub>), 7.57-7.59 (d, 2H, *J* = 8 Hz, H<sub>arom</sub>), 7.68-7.70 (d, 2H, *J* = 8 Hz, H<sub>arom</sub>), 8.37-8.39 (d, 2H, *J* = 8 Hz, H<sub>arom</sub>); <sup>13</sup>C NMR (100 MHz, CDCl<sub>3</sub>): δ 13.6, 24.3, 61.6, 90.2, 115.2, 119.5, 123.8, 124.5, 129.0, 129.2, 137.8, 142.4, 148.3, 151.8, 155.3, 161.5, 166.4; ESI-MS: *m/z* = 403 (M)<sup>+</sup>.

***Ethyl 5-cyano-2-methyl-4-(3-nitrophenyl)-6-(phenylamino)-nicotinate (5h)***

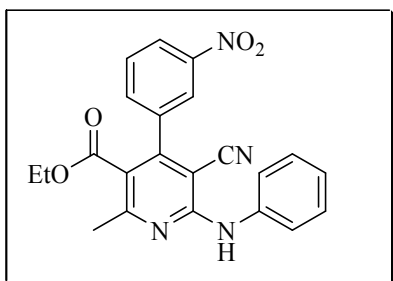

Yellow solid; 196-198/198-200 °C<sup>1</sup>; IR (KBr): 3361 (N-H stretch), 3058 (aromatic C-H stretch), 2218 (CN stretch), 1714, (C=O stretch) cm<sup>-1</sup>; <sup>1</sup>H NMR (400 MHz, CDCl<sub>3</sub>): δ 0.96-1.0 (t, 3H, *J* = 8 Hz, CH<sub>3</sub>), 2.65 (s, 3H, CH<sub>3</sub>), 4.02-4.07 (q, 2H, OCH<sub>2</sub>), 7.18-7.23 (m, 1H, H<sub>arom</sub>), 7.18-7.22 (t, 1H, *J* = 8 Hz, H<sub>arom</sub>), 7.32 (bs, 1H, NH, exchangeable with D<sub>2</sub>O), 7.40-7.44 (t, 2H, *J* = 8 Hz, H<sub>arom</sub>), 7.68-7.74 (m, 4H, H<sub>arom</sub>), 8.29-8.39 (m, 1H, H<sub>arom</sub>); <sup>13</sup>C NMR (100 MHz, CDCl<sub>3</sub>): 13.6, 24.3, 61.6, 90.5, 115.3, 119.8, 121.0, 123.2, 124.3, 124.5, 129.0, 129.9, 134.1, 137.5, 137.9, 148.1, 151.4, 155.4, 161.4, 166.4; ESI-MS: *m/z* = 403 (M)<sup>+</sup>.

***Ethyl 5-cyano-2-methyl-6-(phenylamino)-4-(thiophen-2-yl)nicotinate (5i)***



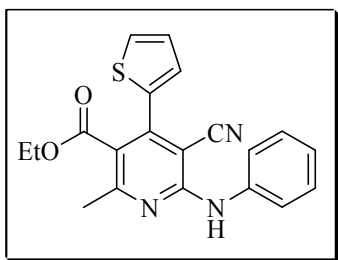

White solid; 188-190/191-192 °C<sup>2</sup>; IR (KBr): 3421 (N-H stretch), 3085 (aromatic C-H stretch), 2215 (CN stretch), 1719 (C=O stretch) cm<sup>-1</sup>; <sup>1</sup>H NMR (400 MHz, CDCl<sub>3</sub>): δ 1.26-1.29 (t, 3H, *J* = 8 Hz, CH<sub>3</sub>), 2.19 (s, 3H, CH<sub>3</sub>), 4.11-4.16 (q, 2H, OCH<sub>2</sub>), 7.24-7.26 (t, 1H, *J* = 4 Hz, H<sub>arom</sub>), 7.30 (bs, 1H, NH, exchangeable with D<sub>2</sub>O), 7.81-7.91 (m, 5H, H<sub>arom</sub>), 8.37-7.38 (d, 2H, *J* = 4 Hz, H<sub>arom</sub>); <sup>13</sup>C NMR (100 MHz, CDCl<sub>3</sub>): δ 14.1, 21.0, 60.4, 62.5, 109.2, 116.0, 128.6, 129.0, 135.1, 136.0, 136.8, 137.1, 141.1, 146.7, 151.0, 162.7, 171.1; ESI-MS: *m/z* = 364 (M)<sup>+</sup>.

***Ethyl 6-(4-fluorophenylamino)-5-cyano-2-methyl-4-phenyl-nicotinate (5j)***

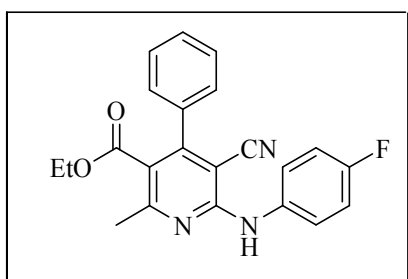

White solid; 192-194 °C; IR (KBr): 3408 (N-H stretch), 3085 (aromatic C-H stretch), 2218 (CN stretch), 1691 (C=O stretch) cm<sup>-1</sup>; <sup>1</sup>H NMR (400 MHz, CDCl<sub>3</sub>): δ 0.94-0.98 (t, 3H, *J* = 8 Hz, CH<sub>3</sub>), 2.59 (s, 3H, CH<sub>3</sub>), 3.94-3.99 (q, 2H, OCH<sub>2</sub>), 7.18-7.20 (d, 2H, *J* = 8 Hz, H<sub>arom</sub>), 7.23 (bs, 1H, NH, exchangeable with D<sub>2</sub>O), 7.39-7.41 (d, 2H, *J* = 8 Hz, H<sub>arom</sub>), 7.47-7.50 (m, 3H, H<sub>arom</sub>), 7.56-7.58 (d, 2H, *J* = 8 Hz, H<sub>arom</sub>); <sup>13</sup>C NMR (100 MHz, CDCl<sub>3</sub>): δ 13.4, 20.9, 61.3, 90.4, 116.0, 120.3, 121.0, 125.1, 126.9, 128.4, 129.5, 129.9, 133.8, 135.4, 153.7, 154.5, 161.4, 167.7; ESI-MS: *m/z* = 376 (M)<sup>+</sup>.

***Ethyl 6-(4-fluorophenylamino)-5-cyano-2-methyl-4-(4-methylphenyl)nicotinate (5k)***

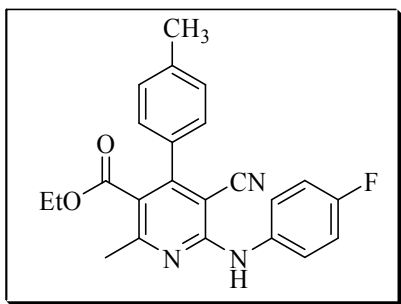

White solid; 175-176 °C; IR (KBr): 3420 (N-H stretch), 3072 (aromatic C-H stretch), 2221 (CN stretch), 1694 (C=O stretch)  $\text{cm}^{-1}$ ;  $^1\text{H}$  NMR (400 MHz,  $\text{CDCl}_3$ ):  $\delta$  0.91-0.93 (t, 3H,  $J = 8$  Hz,  $\text{CH}_3$ ), 2.40 (s, 3H,  $\text{CH}_3$ ), 2.55 (s, 3H,  $\text{CH}_3$ ), 4.02-4.08 (q, 2H,  $\text{OCH}_2$ ), 7.15-7.17 (d, 2H,  $J = 8$  Hz,  $\text{H}_{\text{arom}}$ ), 7.18-7.20 (d, 2H,  $J = 8$  Hz,  $\text{H}_{\text{arom}}$ ), 7.22 (bs, 1H, NH, exchangeable with  $\text{D}_2\text{O}$ ), 7.25-7.27 (d, 2H,  $J = 8$  Hz,  $\text{H}_{\text{arom}}$ ), 7.53-7.55 (d, 2H,  $J = 8$  Hz,  $\text{H}_{\text{arom}}$ );  $^{13}\text{C}$  NMR (100 MHz,  $\text{CDCl}_3$ ):  $\delta$  13.5, 20.8, 21.3, 61.2, 90.5, 116.1, 119.7, 121.0, 126.0, 127.8, 129.2, 129.4, 133.0, 133.7, 135.7, 139.5, 155.6, 160.1, 167.4; ESI-MS:  $m/z = 390$  ( $\text{M}$ ) $^+$ .

***Ethyl 6-(4-fluorophenylamino)-5-cyano-2-methyl-4-(4-nitrophenyl)nicotinate (5l)***

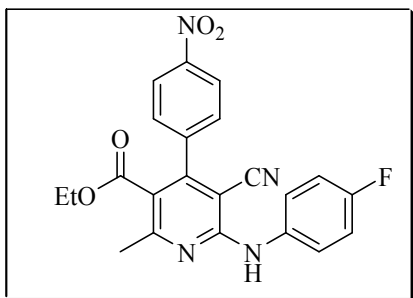

Pale Yellow solid; 213-215 °C; IR (KBr): 3273 (N-H stretch), 3054 (aromatic C-H stretch), 2181 (CN stretch), 1654 (C=O stretch)  $\text{cm}^{-1}$ ;  $^1\text{H}$  NMR (400 MHz,  $\text{CDCl}_3$ ):  $\delta$  1.42-1.46 (t, 3H,  $J = 8$  Hz,  $\text{CH}_3$ ), 2.19 (s, 3H,  $\text{CH}_3$ ), 4.41-4.47 (q, 2H,  $\text{OCH}_2$ ), 7.22-7.24 (d, 2H,  $J = 8$  Hz,  $\text{H}_{\text{arom}}$ ), 7.26 (bs, 1H, NH, exchangeable with  $\text{D}_2\text{O}$ ), 7.34-7.36 (d, 2H,  $J = 8$  Hz,  $\text{H}_{\text{arom}}$ ), 7.64-7.66 (d, 2H,  $J = 8$  Hz,  $\text{H}_{\text{arom}}$ ), 8.14-8.16 (d, 2H,  $J = 8$  Hz,  $\text{H}_{\text{arom}}$ );  $^{13}\text{C}$  NMR (100 MHz,  $\text{CDCl}_3$ ):  $\delta$  14.0, 29.7, 30.9, 41.6, 61.5, 63.3, 107.3, 114.5, 123.4, 124.3, 127.8, 129.8, 131.5, 136.9, 149.7, 151.7, 161.4, 166.6; ESI-MS:  $m/z = 421$  ( $\text{M}$ ) $^+$ .

***Ethyl 6-(4-fluorophenylamino)-5-cyano-2-methyl-4-(3-nitrophenyl)nicotinate (5m)***

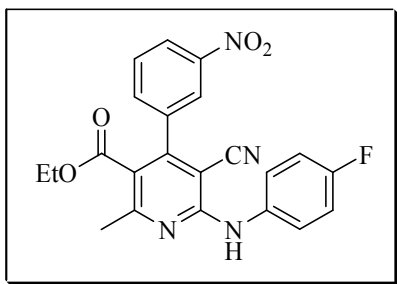

Yellow solid; 196-198 °C; IR (KBr): 3332 (N-H stretch), 3057 (aromatic C-H stretch), 2214 (CN stretch), 1714 (C=O stretch)  $\text{cm}^{-1}$ ;  $^1\text{H}$  NMR (400 MHz,  $\text{CDCl}_3$ ):  $\delta$  0.97-1.0 (t, 3H,  $J = 8$  Hz,  $\text{CH}_3$ ), 2.63 (s, 3H,  $\text{CH}_3$ ), 4.02-4.08 (q, 2H,  $\text{OCH}_2$ ), 7.09-7.13 (t, 2H,  $J = 8$  Hz,  $\text{H}_{\text{arom}}$ ), 7.25 (bs, 1H, NH, exchangeable with  $\text{D}_2\text{O}$ ), 7.60-7.63 (m, 2H,  $\text{H}_{\text{arom}}$ ), 7.70-7.76 (m, 2H,  $\text{H}_{\text{arom}}$ ), 8.37-8.39 (d, 2H,  $J = 8$  Hz,  $\text{H}_{\text{arom}}$ );  $^{13}\text{C}$  NMR (100 MHz,  $\text{CDCl}_3$ ):  $\delta$  13.6, 24.2, 30.9, 61.6, 90.3, 115.2, 115.6, 115.8, 120.0, 123.2, 123.3, 124.3, 129.9, 133.7, 133.8, 134.0, 137.4, 148.1, 151.4, 155.4, 158.4, 160.8, 161.4, 166.3; ESI-MS:  $m/z = 421$  ( $\text{M}$ ) $^+$ .

***Ethyl 5-cyano-2-methyl-4-phenyl-6-(4-methylphenylamino)nicotinate (5n)***

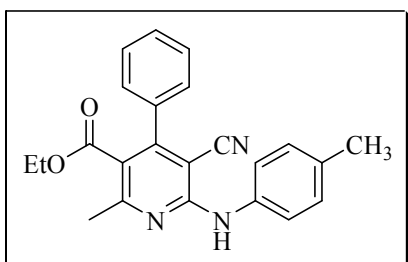

White solid; 139-141/141-142 °C $^1$ ; IR (KBr): 3331 (N-H stretch), 3061 (aromatic C-H stretch), 2220 (CN stretch), 1712 (C=O stretch)  $\text{cm}^{-1}$ ;  $^1\text{H}$  NMR (400 MHz,  $\text{CDCl}_3$ ):  $\delta$  0.84-0.88 (t, 3H,  $J = 8$  Hz,  $\text{CH}_3$ ), 2.36 (s, 3H,  $\text{CH}_3$ ), 2.58 (s, 3H,  $\text{CH}_3$ ), 3.96-4.01 (q, 2H,  $\text{OCH}_2$ ), 7.14-7.16 (d, 2H,  $J = 8$  Hz,  $\text{H}_{\text{arom}}$ ), 7.22 (bs, 1H, NH, exchangeable with  $\text{D}_2\text{O}$ ), 7.34-7.36 (d, 2H,  $J = 8$  Hz,  $\text{H}_{\text{arom}}$ ), 7.45-7.48 (m, 3H,  $\text{H}_{\text{arom}}$ ), 7.55-7.57 (d, 2H,  $J = 8$  Hz,  $\text{H}_{\text{arom}}$ );  $^{13}\text{C}$  NMR (100 MHz,  $\text{CDCl}_3$ ):  $\delta$  13.4, 20.9, 23.9, 61.3, 90.4, 116.0, 120.1, 121.0, 127.9, 128.6, 129.4, 126.1, 129.9, 133.8, 135.6, 153.9, 155.5, 160.4, 167.3; ESI-MS:  $m/z = 372$  ( $\text{M}$ ) $^+$ .

***Ethyl 4-(4-bromophenyl)-5-cyano-2-methyl-6-(4-methylphenylamino)nicotinate (5o)***

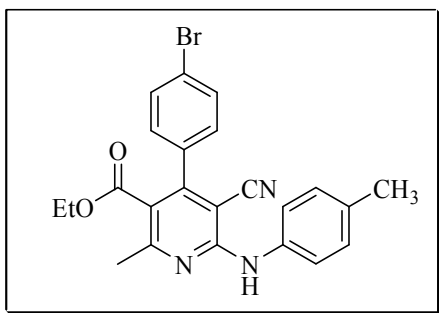

Pale Yellow solid; 164-166/166-168 °C<sup>1</sup>; IR (KBr): 3323 (N-H stretch), 3064 (aromatic C-H stretch), 2222 (CN stretch), 1708 (C=O stretch) cm<sup>-1</sup>; <sup>1</sup>H NMR (400 MHz, CDCl<sub>3</sub>): δ 0.94-0.98 (t, 3H, *J* = 8 Hz, CH<sub>3</sub>), 2.36 (s, 3H, CH<sub>3</sub>), 2.56 (s, 3H, CH<sub>3</sub>), 4.02-4.08 (q, 2H, OCH<sub>2</sub>), 7.16-7.25 (m, 4H, H<sub>arom</sub>), 7.25 (bs, 1H, NH, exchangeable with D<sub>2</sub>O), 7.53-7.55 (d, 2H, *J* = 8 Hz, H<sub>arom</sub>), 7.62-7.64 (d, 2H, *J* = 8 Hz, H<sub>arom</sub>); <sup>13</sup>C NMR (100 MHz, CDCl<sub>3</sub>): δ 13.5, 20.9, 24.0, 61.4, 90.1, 115.8, 119.8, 121.1, 123.9, 129.5, 129.6, 131.3, 134.0, 134.8, 135.4, 152.7, 155.5, 160.7, 167.0; ESI-MS: *m/z* = 451 (M)<sup>+</sup>, 453 (M+2)<sup>+</sup>.

### Spectral data of synthesized compounds listed in Table 8

#### *Benzonitrile (2a)*

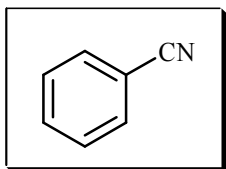

Liquid<sup>3</sup>, IR (KBr): 2228 (CN stretch) cm<sup>-1</sup>; <sup>1</sup>H NMR (400 MHz, CDCl<sub>3</sub>): δ 7.43-7.46. (t, 2H, *J* = 8 Hz, H<sub>arom</sub>), 7.50-7.53 (t, 1H, *J* = 8 Hz, H<sub>arom</sub>), 7.58-7.59 (d, 2H, *J* = 4 Hz, H<sub>arom</sub>); <sup>13</sup>C NMR (100 MHz, CDCl<sub>3</sub>): δ 113.1, 119.1, 129.0, 132.0, 133.1; ESI-MS: *m/z* = 104 (M)<sup>+</sup>.

#### *4-Methylbenzonitrile (2b)*

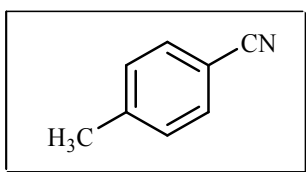

Pale Yellow solid; 19-21/21-22 °C<sup>4</sup>; IR (KBr): 2226 (CN stretch) cm<sup>-1</sup>; <sup>1</sup>H NMR (400 MHz, CDCl<sub>3</sub>): δ 3.36 (s, 3H, CH<sub>3</sub>), 7.23-7.25 (d, 2H, *J* = 8 Hz, H<sub>arom</sub>), 7.46-7.48 (d, 2H, *J* = 8 Hz,

H<sub>arom</sub>); <sup>13</sup>C NMR (100 MHz, CDCl<sub>3</sub>): δ 22.6, 108.1, 119.4, 128.9, 132.8, 144.5; ESI-MS: m/z = 118 (M)<sup>+</sup>.

#### **4-Methoxybenzonitrile (2c)**

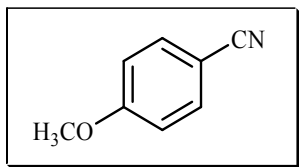

White solid; 60-62/63-64 °C<sup>4</sup>; IR (KBr): 2227 (CN stretch) cm<sup>-1</sup>; <sup>1</sup>H NMR (400 MHz, CDCl<sub>3</sub>): δ 3.88 (s, 3H, OCH<sub>3</sub>), 6.96-6.98 (d, 2H, *J* = 8 Hz, H<sub>arom</sub>), 7.60-7.62 (d, 2H, *J* = 8 Hz, H<sub>arom</sub>); <sup>13</sup>C NMR (100 MHz, CDCl<sub>3</sub>): δ 55.5, 103.9, 114.7, 119.2, 134.0, 162.8; ESI-MS: m/z = 134 (M)<sup>+</sup>.

#### **4-Bromobenzonitrile (2d)**

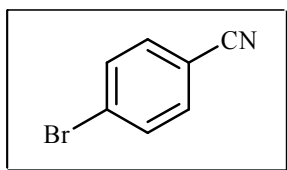

White solid; 110-112/110-115 °C<sup>5</sup>; IR (KBr): 2227 (CN stretch) cm<sup>-1</sup>; <sup>1</sup>H NMR (400 MHz, CDCl<sub>3</sub>): δ 7.54-7.56 (d, 2H, *J* = 8 Hz, H<sub>arom</sub>), 7.64-7.66 (d, 2H, *J* = 8 Hz, H<sub>arom</sub>); <sup>13</sup>C NMR (100 MHz, CDCl<sub>3</sub>): δ 111.2, 118.1, 128.1, 132.6, 133.4; ESI-MS: m/z = 182 (M)<sup>+</sup>, 184 (M+2)<sup>+</sup>.

#### **4-Chlorobenzonitrile (2e)**

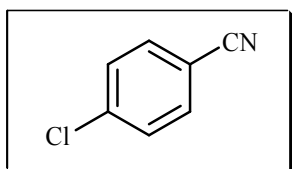

White solid; 90-92/90-91 °C<sup>4</sup>; IR (KBr): 2229 (CN stretch) cm<sup>-1</sup>; <sup>1</sup>H NMR (400 MHz, CDCl<sub>3</sub>): δ 7.48-7.50 (d, 2H, *J* = 8 Hz, H<sub>arom</sub>), 7.62-7.64 (d, 2H, *J* = 8 Hz, H<sub>arom</sub>); <sup>13</sup>C NMR (100 MHz, CDCl<sub>3</sub>): δ 110.9, 118.1, 129.9, 133.7, 139.7; ESI-MS: m/z = 139 (M)<sup>+</sup>, 141 (M+2)<sup>+</sup>.

### 2-Chlorobenzonitrile (2f)

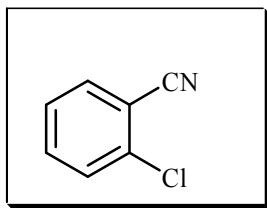

Pale yellow solid; 40-42/42-43 °C<sup>6</sup>; IR (KBr): 2231 (CN stretch) cm<sup>-1</sup>; <sup>1</sup>H NMR (400 MHz, CDCl<sub>3</sub>): δ 7.39-7.43 (d, 1H, *J* = 8 Hz, H<sub>arom</sub>), 7.48-7.61 (m, 2H, *J* = 8 Hz, H<sub>arom</sub>), 7.67-7.69 (d, 1H, *J* = 8 Hz, H<sub>arom</sub>); <sup>13</sup>C NMR (100 MHz, CDCl<sub>3</sub>): δ 113.4, 116.2, 127.1, 130.4, 133.8, 134.2, 136.8; ESI-MS: *m/z* = 139 (M)<sup>+</sup>, 141 (M+2)<sup>+</sup>.

### 4-Nitrobenzonitrile (2g)

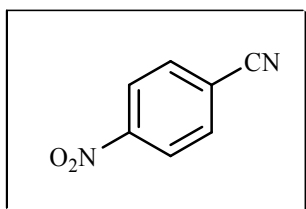

Pale yellow solid; 115-117/116-117 °C<sup>4</sup>; IR (KBr): 2233 (CN stretch) cm<sup>-1</sup>; <sup>1</sup>H NMR (400 MHz, CDCl<sub>3</sub>): δ 7.91-7.93 (d, 2H, *J* = 8 Hz, H<sub>arom</sub>), 8.38-8.40 (d, 2H, *J* = 8 Hz, H<sub>arom</sub>); <sup>13</sup>C NMR (100 MHz, CDCl<sub>3</sub>): δ 116.8, 118.3, 123.6, 124.3, 133.4; ESI-MS: *m/z* = 152 (M)<sup>+</sup>.

### 3-Nitrobenzonitrile (2h)

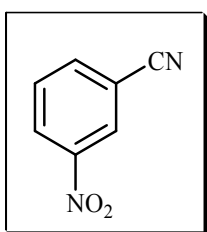

Pale yellow solid; 116-118/118 °C<sup>7</sup>; IR (KBr): 2235 (CN stretch) cm<sup>-1</sup>; <sup>1</sup>H NMR (400 MHz, CDCl<sub>3</sub>): δ 7.95 (s, 1H, H<sub>arom</sub>), 8.01-8.03 (d, 2H, *J* = 8 Hz, H<sub>arom</sub>), 8.07-8.11 (t, 1H, *J* = 8 Hz, H<sub>arom</sub>); <sup>13</sup>C NMR (100 MHz, CDCl<sub>3</sub>): δ 114.2, 116.2, 127.3, 130.6, 133.3, 137.5, 148.2; ESI-MS: *m/z* = 152 (M)<sup>+</sup>.

**2-Thiophenecarbonitrile (2i)**

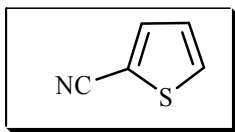

Liquid<sup>4</sup>, IR (KBr): 2221 (CN stretch)  $\text{cm}^{-1}$ ; <sup>1</sup>H NMR (400 MHz, CDCl<sub>3</sub>):  $\delta$  7.09-7.12 (t, 1H,  $J = 8$  Hz, H<sub>arom</sub>), 7.49-7.50 (d, 1H,  $J = 4$  Hz, H<sub>arom</sub>), 7.54-7.56 (d, 1H,  $J = 8$  Hz, H<sub>arom</sub>); <sup>13</sup>C NMR (100 MHz, CDCl<sub>3</sub>):  $\delta$  109.5, 114.5, 127.8, 129.5, 138.2; ESI-MS:  $m/z = 110$  (M)<sup>+</sup>.

**1-Naphthalenecarbonitrile (2j)**

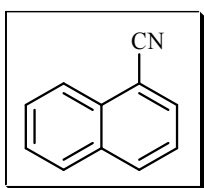

Pale yellow solid; 116-118/118 °C<sup>3</sup>; IR (KBr): 2219 (CN stretch)  $\text{cm}^{-1}$ ; <sup>1</sup>H NMR (400 MHz, CDCl<sub>3</sub>):  $\delta$  7.53-7.55 (d, 1H,  $J = 8$  Hz, H<sub>arom</sub>), 7.64-7.66 (d, 1H,  $J = 8$  Hz, H<sub>arom</sub>), 7.75-7.92 (m, 5H, H<sub>arom</sub>); <sup>13</sup>C NMR (100 MHz, CDCl<sub>3</sub>):  $\delta$  110.3, 117.7, 124.6, 125.1, 127.4, 128.5, 128.6; ESI-MS:  $m/z = 154$  (M)<sup>+</sup>.

## 4. Spectral data of some selected compounds

### <sup>1</sup>H spectrum of 5a

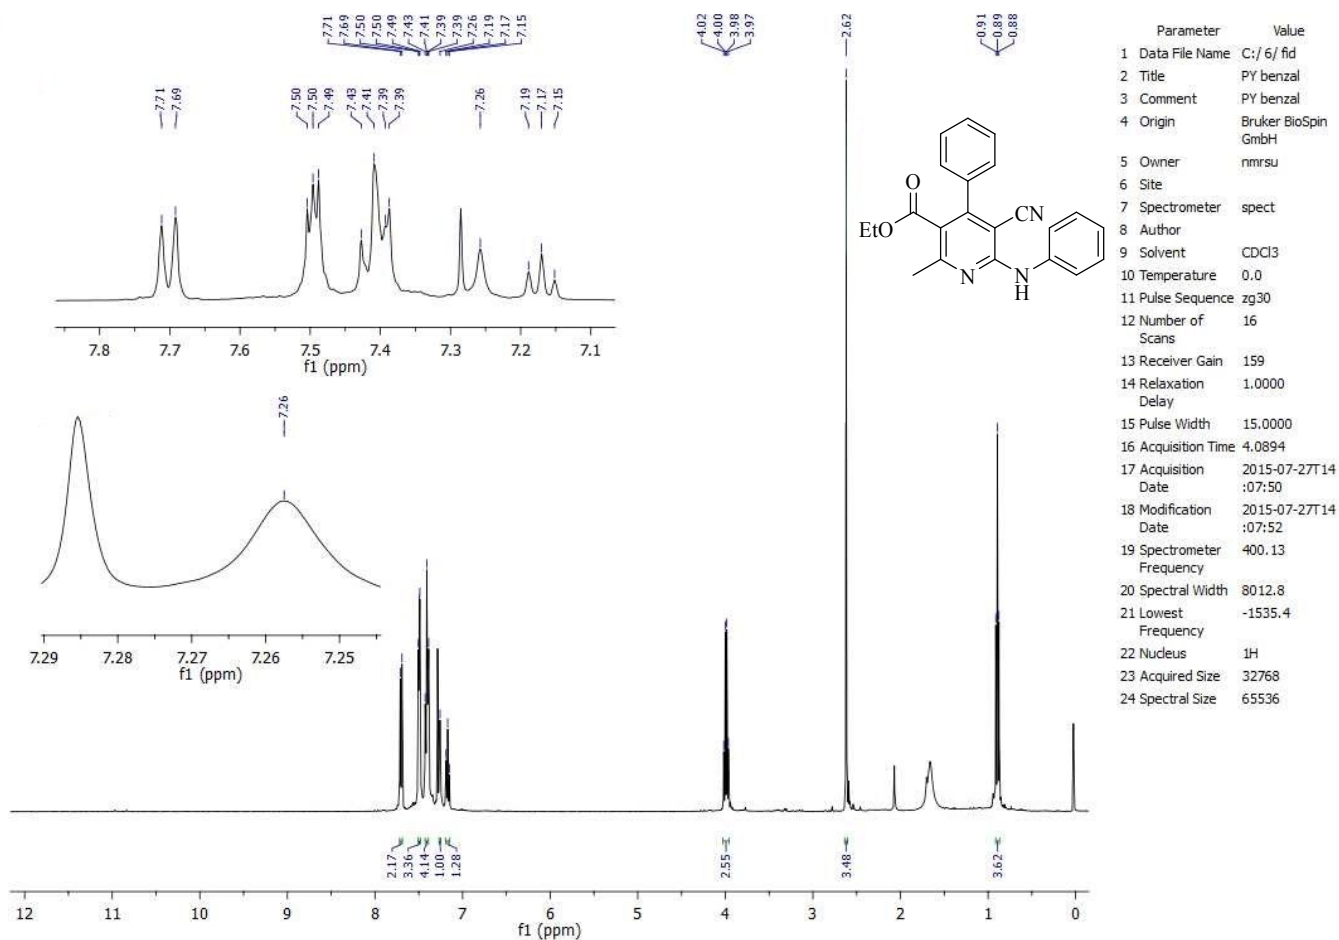



# D<sub>2</sub>O spectrum of 5a

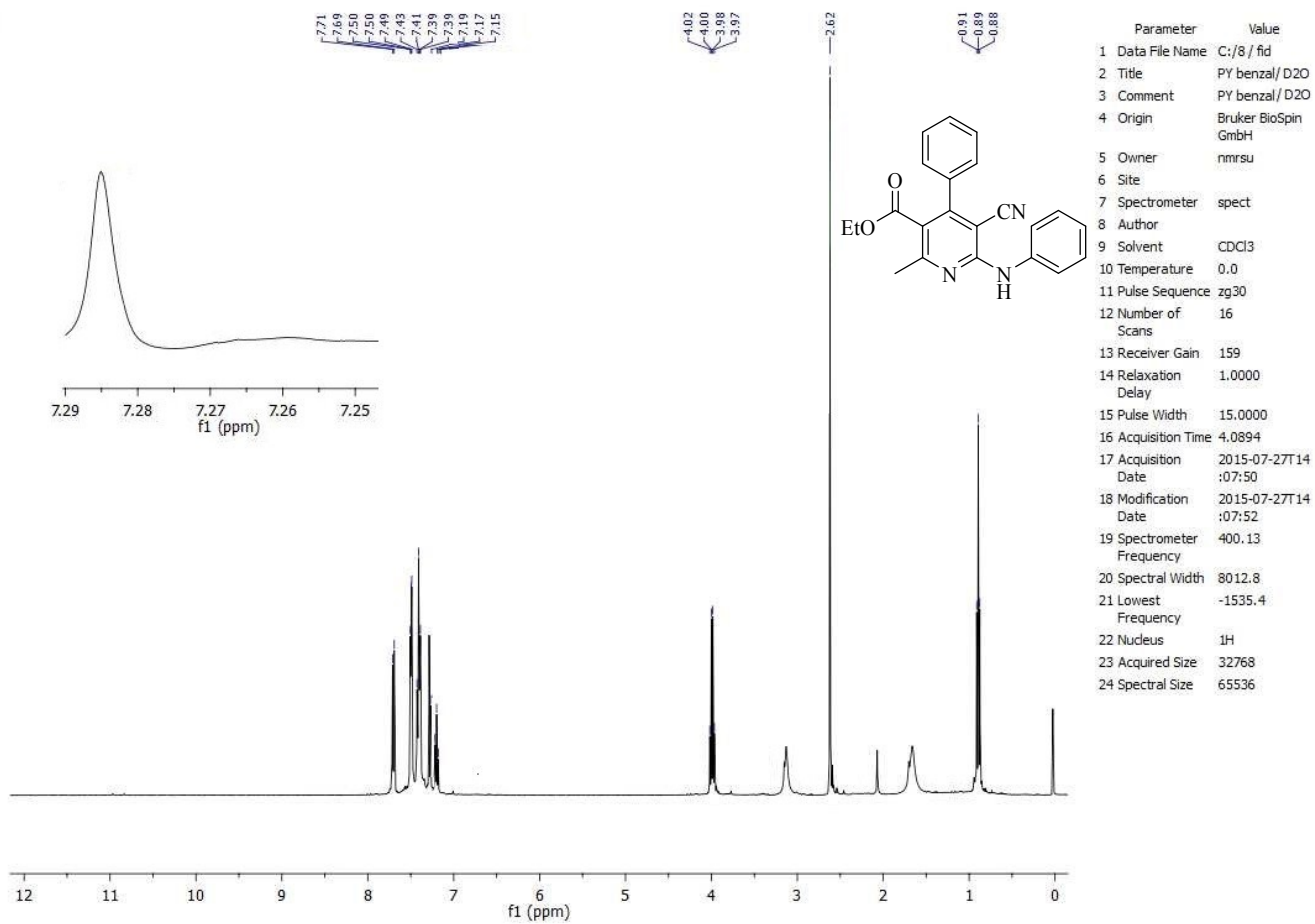

# <sup>13</sup>C spectrum of 5a

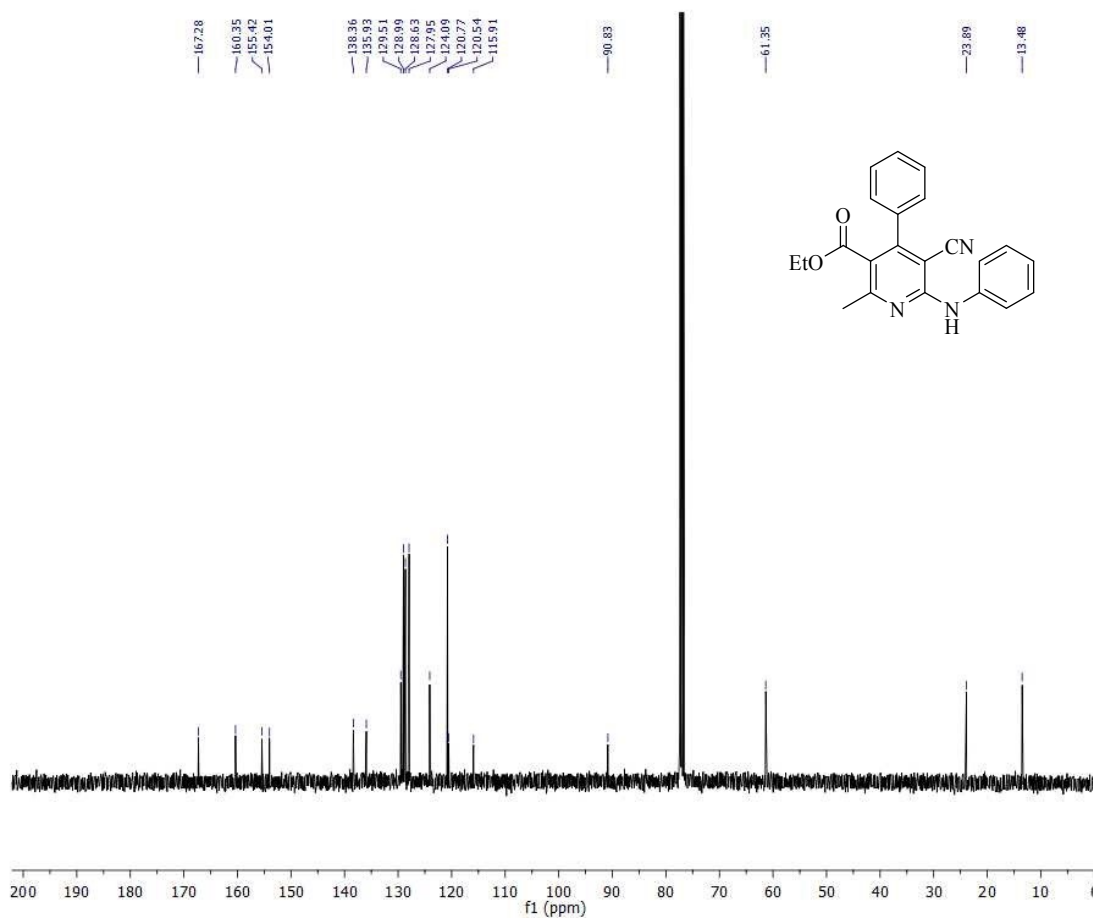

| Parameter                 | Value               |
|---------------------------|---------------------|
| 1 Data File Name          | C:/ 7/ fid          |
| 2 Title                   | PY benzal           |
| 3 Comment                 | PY benzal           |
| 4 Origin                  | Bruker BioSpin GmbH |
| 5 Owner                   | nmrsu               |
| 6 Site                    |                     |
| 7 Spectrometer            | spect               |
| 8 Author                  |                     |
| 9 Solvent                 | CDCl3               |
| 10 Temperature            | 0.0                 |
| 11 Pulse Sequence         | zgpg30              |
| 12 Number of Scans        | 326                 |
| 13 Receiver Gain          | 199                 |
| 14 Relaxation Delay       | 2.0000              |
| 15 Pulse Width            | 9.8000              |
| 16 Acquisition Time       | 1.3631              |
| 17 Acquisition Date       | 2015-07-27T14:27:09 |
| 18 Modification Date      | 2015-07-27T14:27:18 |
| 19 Spectrometer Frequency | 100.61              |
| 20 Spectral Width         | 24038.5             |
| 21 Lowest Frequency       | -1958.9             |
| 22 Nucleus                | 13C                 |
| 23 Acquired Size          | 32768               |
| 24 Spectral Size          | 65536               |

# <sup>1</sup>H spectrum of 5c

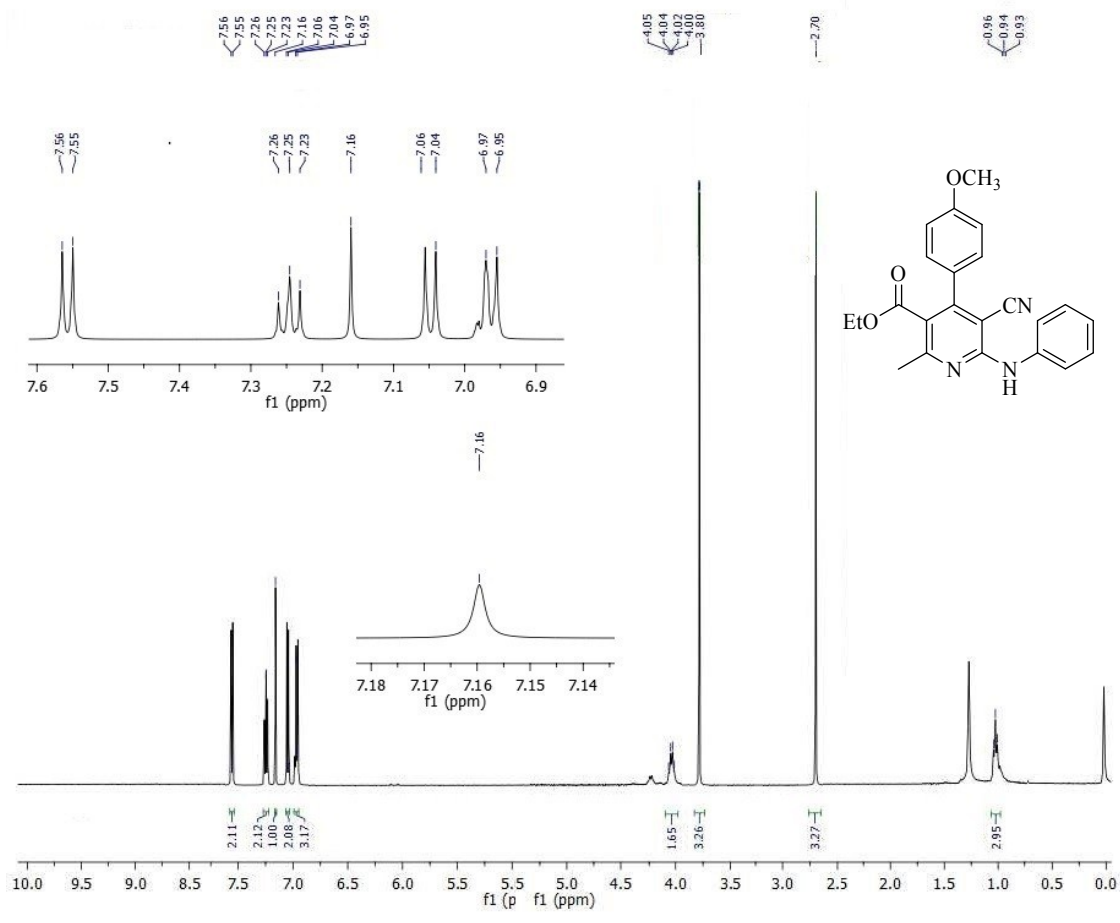

| Parameter                 | Value               |
|---------------------------|---------------------|
| 1 Data File Name          | C:/ 11/ fid         |
| 2 Title                   | PY-OMe benzal       |
| 3 Comment                 | PY-OMe benzal       |
| 4 Origin                  | Bruker BioSpin GmbH |
| 5 Owner                   | nmsu                |
| 6 Site                    |                     |
| 7 Spectrometer            | spect               |
| 8 Author                  |                     |
| 9 Solvent                 | CDCl3               |
| 10 Temperature            | 0.0                 |
| 11 Pulse Sequence         | zg30                |
| 12 Number of Scans        | 16                  |
| 13 Receiver Gain          | 159                 |
| 14 Relaxation Delay       | 1.0000              |
| 15 Pulse Width            | 15.0000             |
| 16 Acquisition Time       | 4.0894              |
| 17 Acquisition Date       | 2015-06-26T14:34:17 |
| 18 Modification Date      | 2015-06-26T14:34:18 |
| 19 Spectrometer Frequency | 400.13              |
| 20 Spectral Width         | 8012.8              |
| 21 Lowest Frequency       | -1535.4             |
| 22 Nucleus                | <sup>1</sup> H      |
| 23 Acquired Size          | 32768               |
| 24 Spectral Size          | 65536               |

# <sup>13</sup>C spectrum of 5c

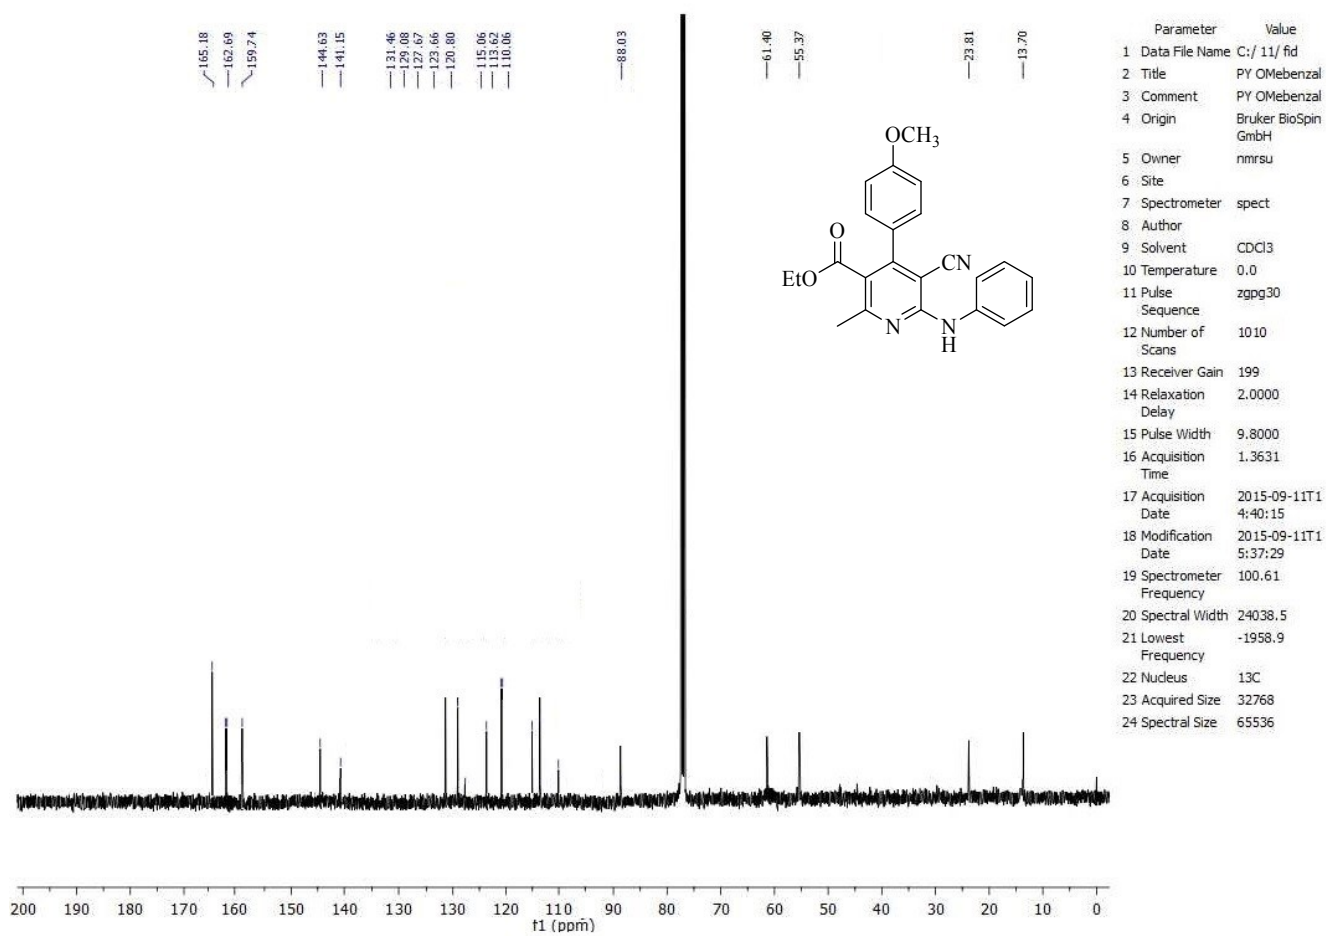

# <sup>1</sup>H spectrum of 5g

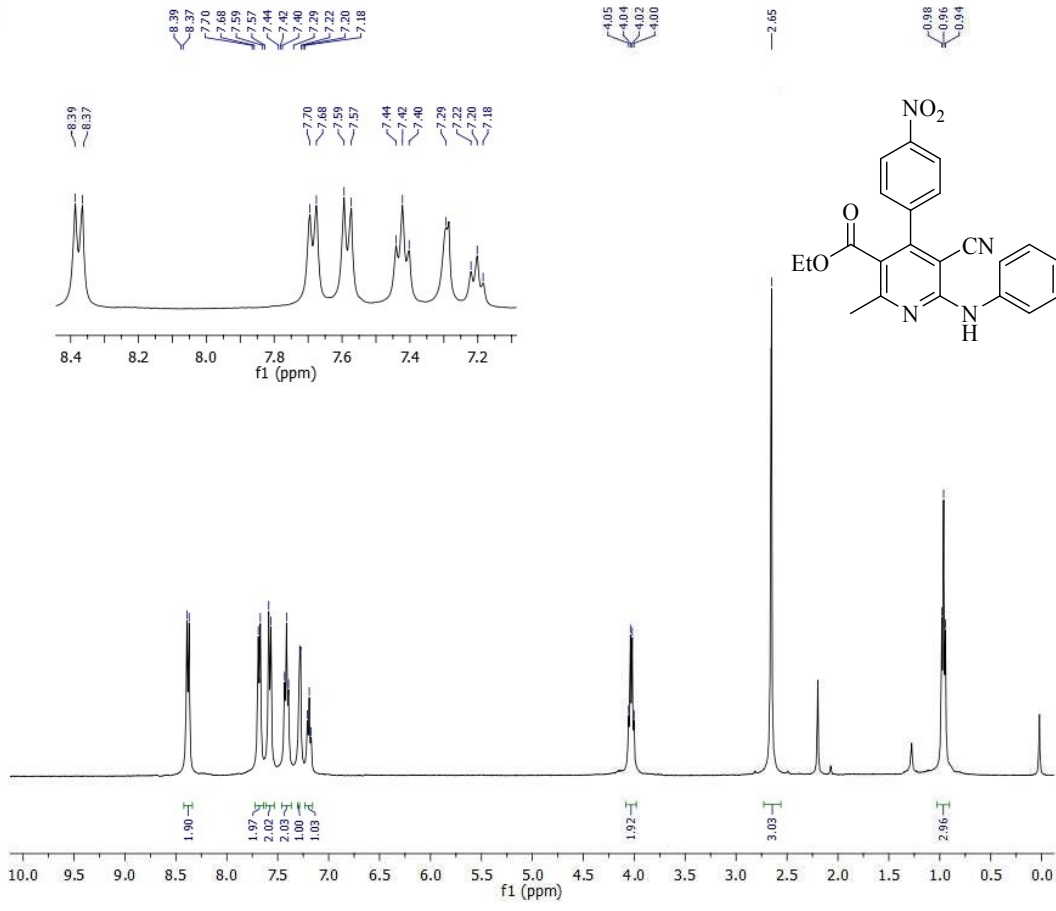

| Parameter                 | Value               |
|---------------------------|---------------------|
| 1 Data File Name          | C:/ 10/ fid         |
| 2 Title                   | May29-2015          |
| 3 Comment                 | PY-PN               |
| 4 Origin                  | Bruker BioSpin GmbH |
| 5 Owner                   | nmrsu               |
| 6 Site                    |                     |
| 7 Spectrometer            | spect               |
| 8 Author                  |                     |
| 9 Solvent                 | CDCl3               |
| 10 Temperature            | 0.0                 |
| 11 Pulse Sequence         | zg30                |
| 12 Number of Scans        | 16                  |
| 13 Receiver Gain          | 159                 |
| 14 Relaxation Delay       | 1.0000              |
| 15 Pulse Width            | 15.0000             |
| 16 Acquisition Time       | 4.0894              |
| 17 Acquisition Date       | 2015-05-29T13:34:00 |
| 18 Modification Date      | 2015-05-29T13:34:20 |
| 19 Spectrometer Frequency | 400.13              |
| 20 Spectral Width         | 8012.8              |
| 21 Lowest Frequency       | -1535.4             |
| 22 Nucleus                | <sup>1</sup> H      |
| 23 Acquired Size          | 32768               |
| 24 Spectral Size          | 65536               |

# <sup>13</sup>C spectrum of 5g

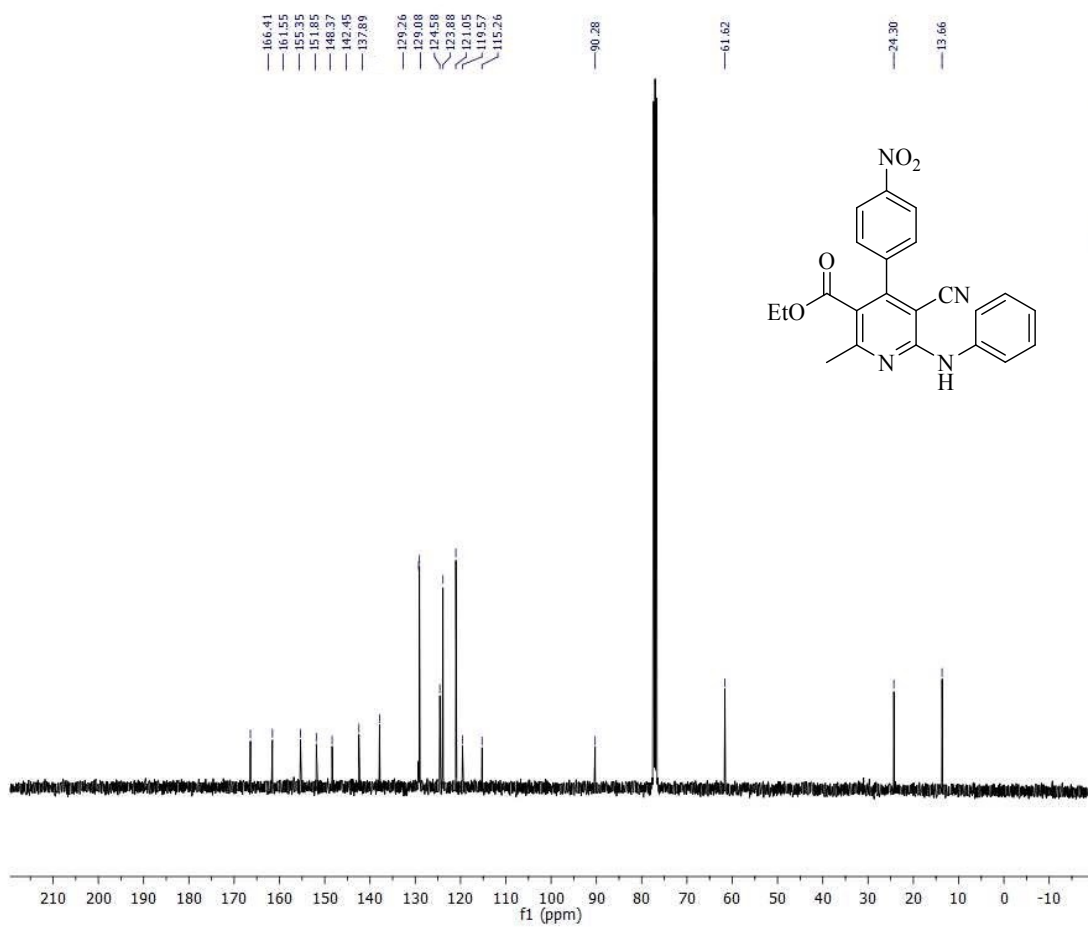

| Parameter                 | Value               |
|---------------------------|---------------------|
| 1 Data File Name          | C:/ 11/ fid         |
| 2 Title                   | May29-2015          |
| 3 Comment                 | PY-PN               |
| 4 Origin                  | Bruker BioSpin GmbH |
| 5 Owner                   | nmrsu               |
| 6 Site                    |                     |
| 7 Spectrometer            | spect               |
| 8 Author                  |                     |
| 9 Solvent                 | CDCl3               |
| 10 Temperature            | 0.0                 |
| 11 Pulse Sequence         | zgpg30              |
| 12 Number of Scans        | 694                 |
| 13 Receiver Gain          | 199                 |
| 14 Relaxation Delay       | 2.0000              |
| 15 Pulse Width            | 9.8000              |
| 16 Acquisition Time       | 1.3631              |
| 17 Acquisition Date       | 2015-05-29T13:53:00 |
| 18 Modification Date      | 2015-05-29T14:15:09 |
| 19 Spectrometer Frequency | 100.61              |
| 20 Spectral Width         | 24038.5             |
| 21 Lowest Frequency       | -1958.9             |
| 22 Nucleus                | 13C                 |
| 23 Acquired Size          | 32768               |
| 24 Spectral Size          | 65536               |

# <sup>1</sup>H spectrum of 5i

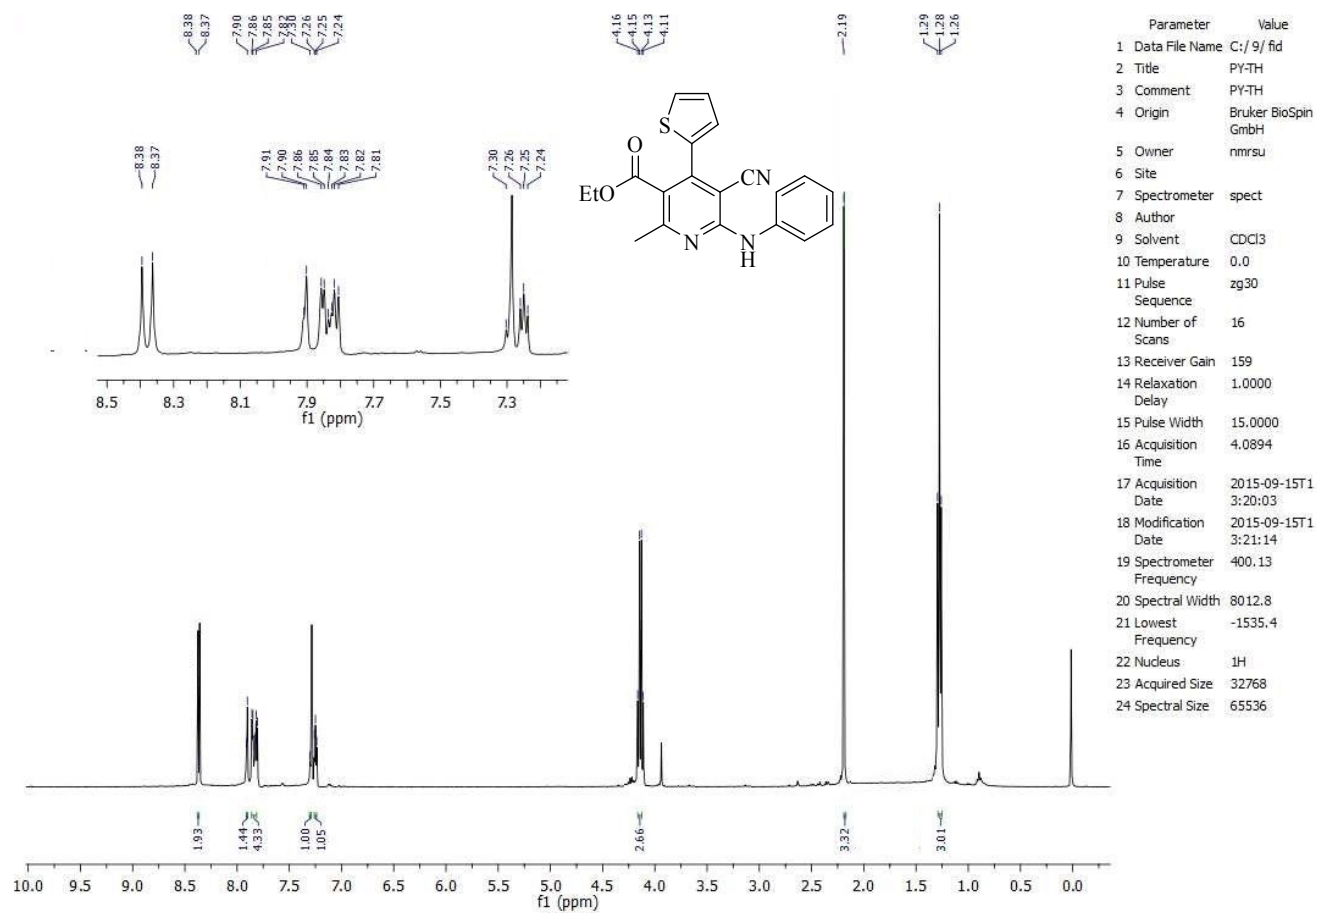

# <sup>13</sup>C spectrum of 5i

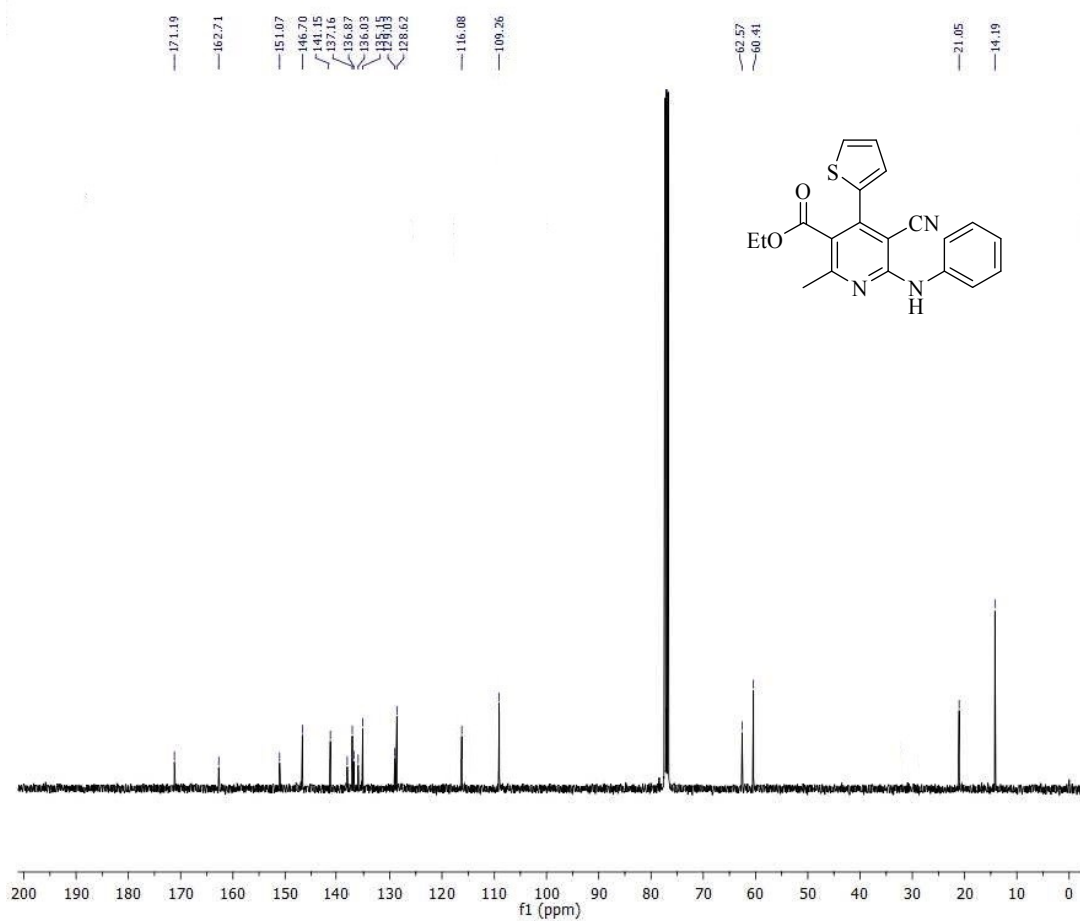

| Parameter                 | Value               |
|---------------------------|---------------------|
| 1 Data File Name          | C:/10/fid           |
| 2 Title                   | PY-TH               |
| 3 Comment                 | PY-TH               |
| 4 Origin                  | Bruker BioSpin GmbH |
| 5 Owner                   | nmrsu               |
| 6 Site                    |                     |
| 7 Spectrometer            | spect               |
| 8 Author                  |                     |
| 9 Solvent                 | CDCl3               |
| 10 Temperature            | 0.0                 |
| 11 Pulse Sequence         | zgpg30              |
| 12 Number of Scans        | 1024                |
| 13 Receiver Gain          | 199                 |
| 14 Relaxation Delay       | 2.0000              |
| 15 Pulse Width            | 9.8000              |
| 16 Acquisition Time       | 1.3631              |
| 17 Acquisition Date       | 2015-09-15T13:49:58 |
| 18 Modification Date      | 2015-09-15T14:20:26 |
| 19 Spectrometer Frequency | 100.61              |
| 20 Spectral Width         | 24038.5             |
| 21 Lowest Frequency       | -1958.9             |
| 22 Nucleus                | 13C                 |
| 23 Acquired Size          | 32768               |
| 24 Spectral Size          | 65536               |



# <sup>1</sup>H spectrum of 5m

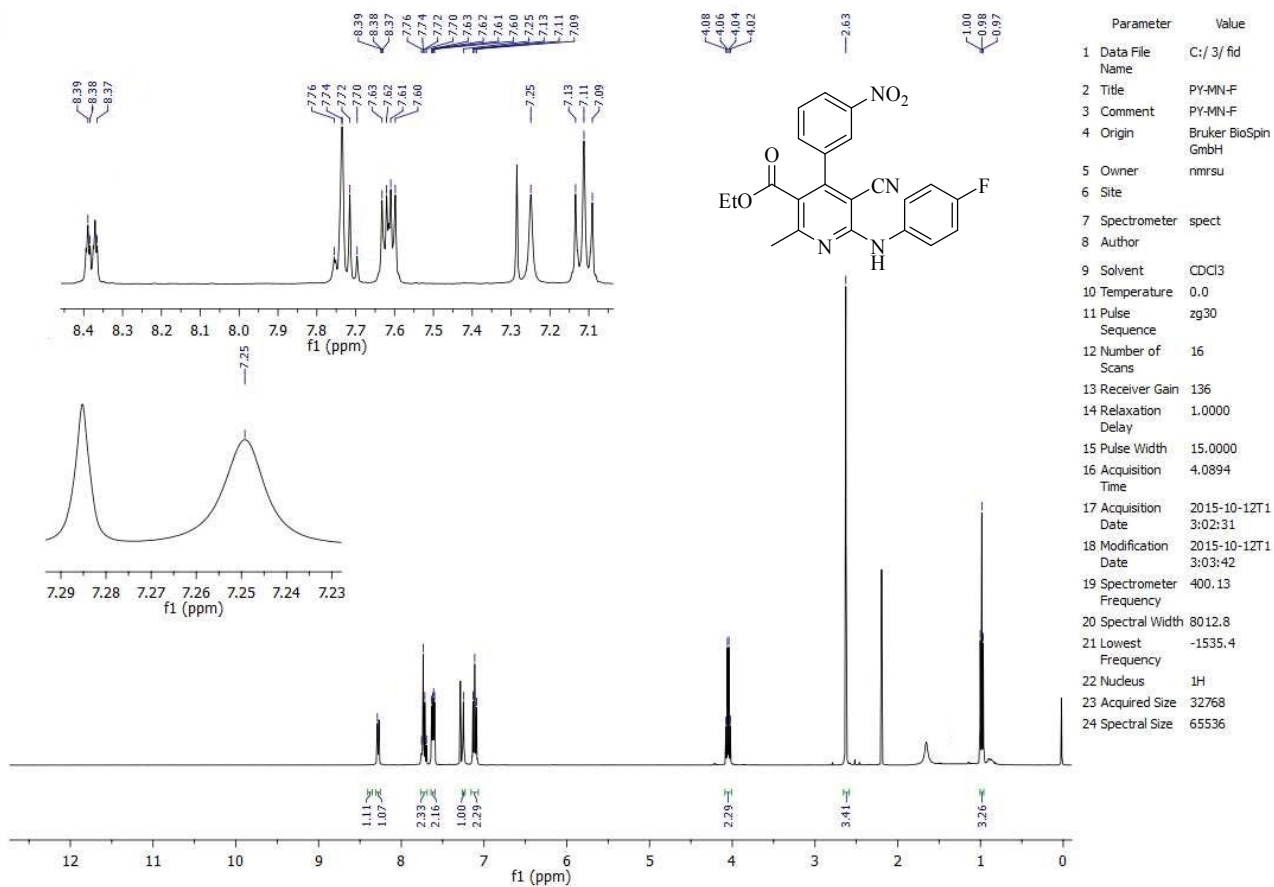

# D<sub>2</sub>O spectrum of 5m

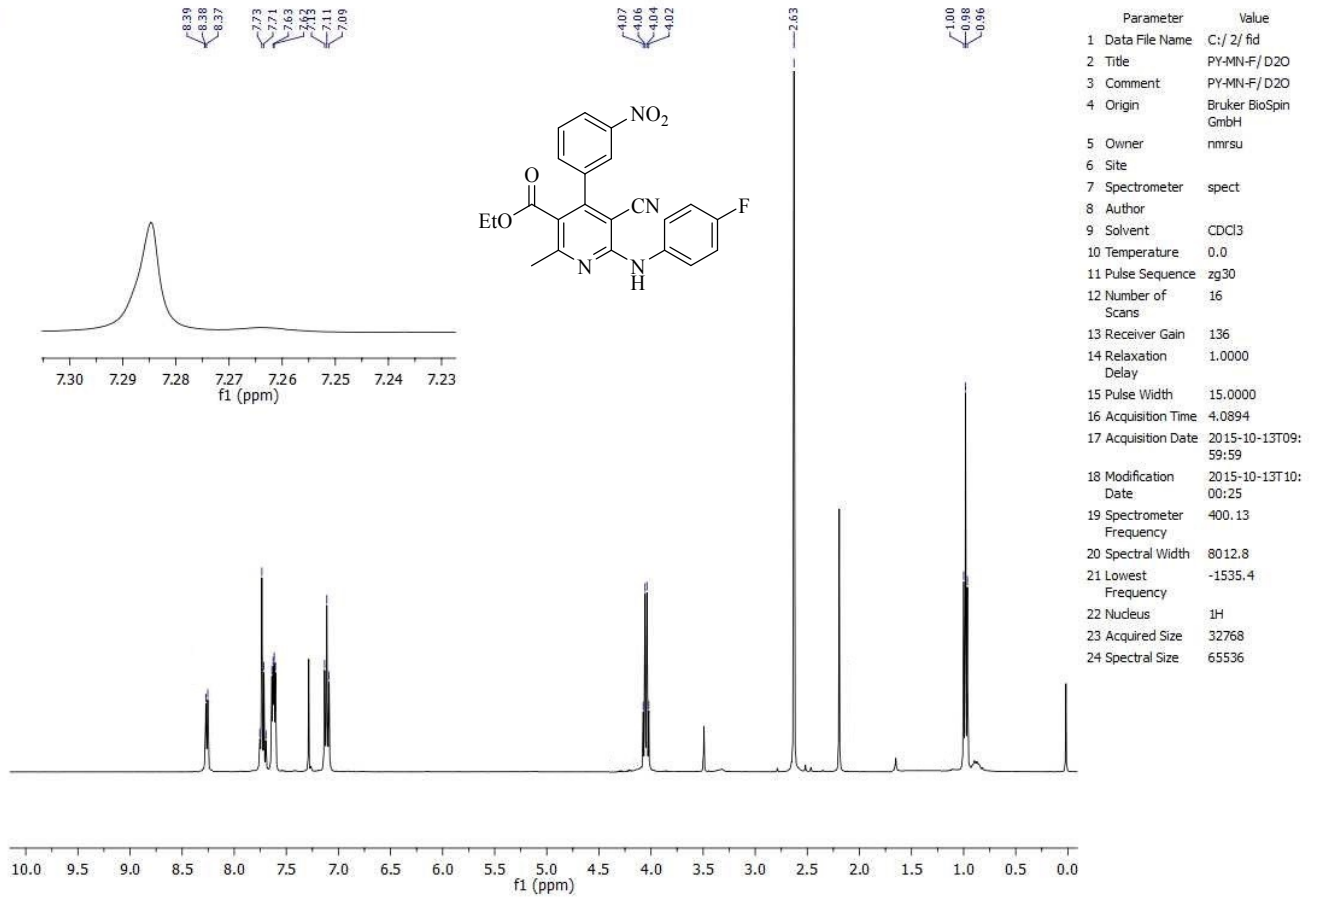

# <sup>13</sup>C spectrum of 5m

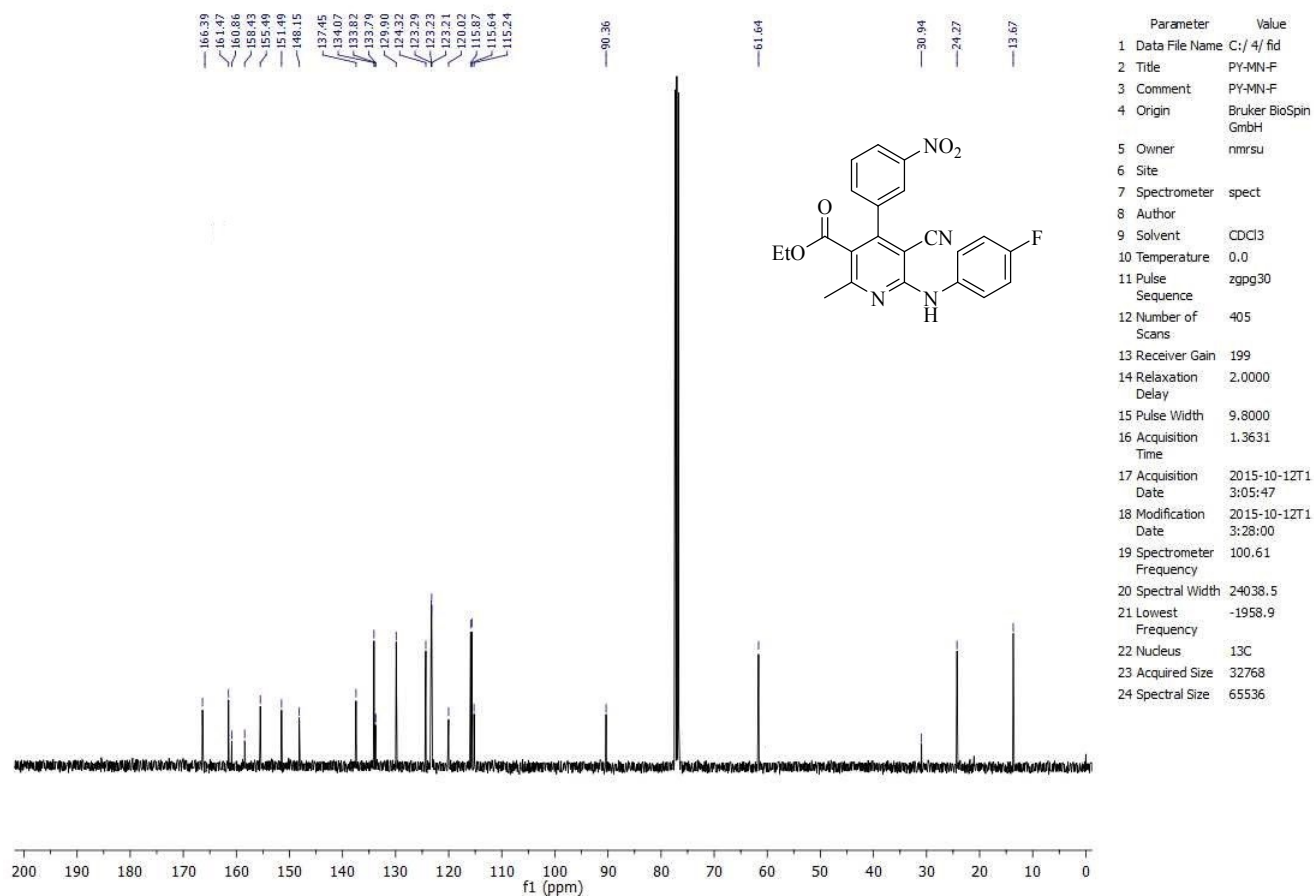

# <sup>1</sup>H spectrum of 2a

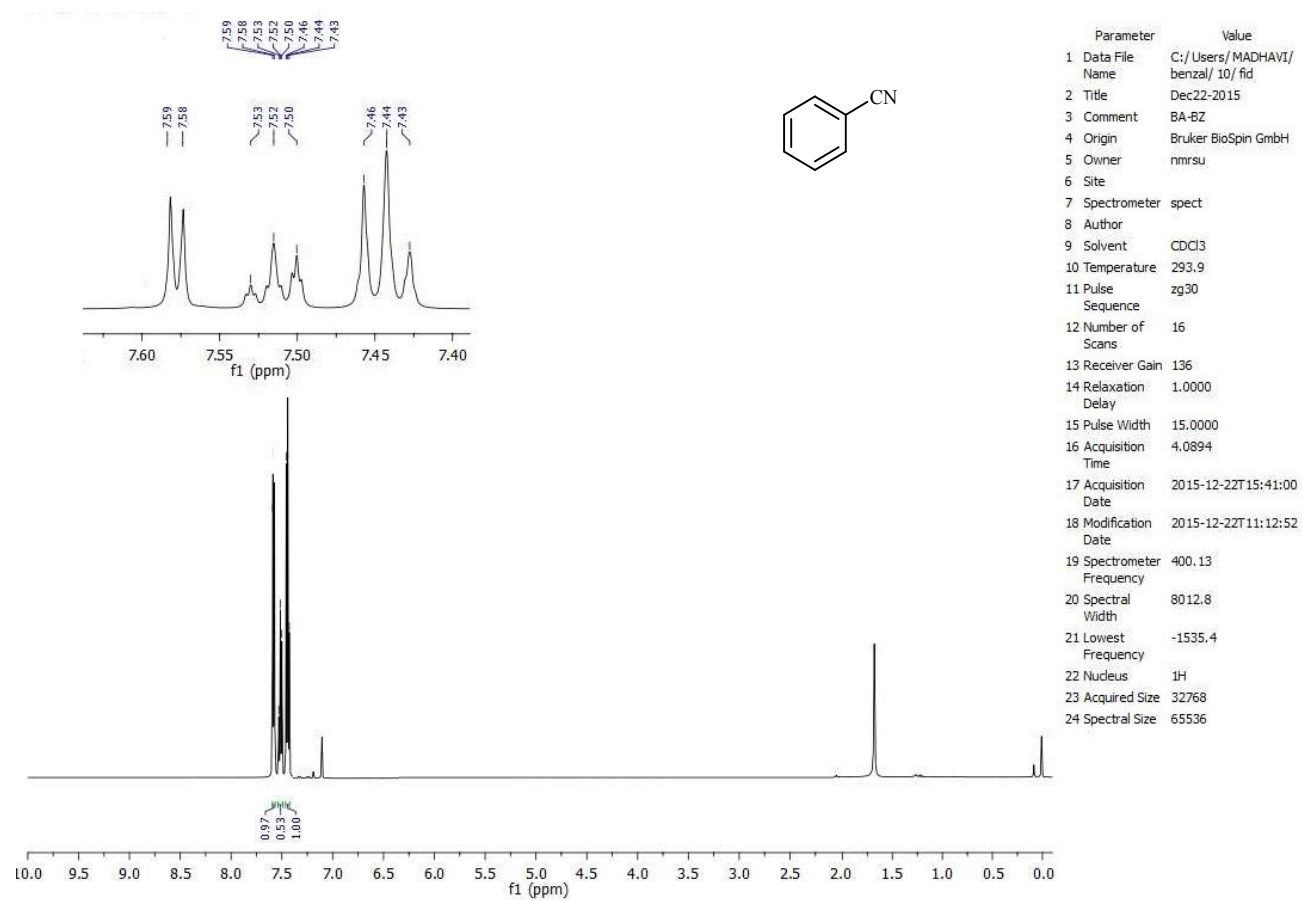

# <sup>13</sup>C spectrum of 2a

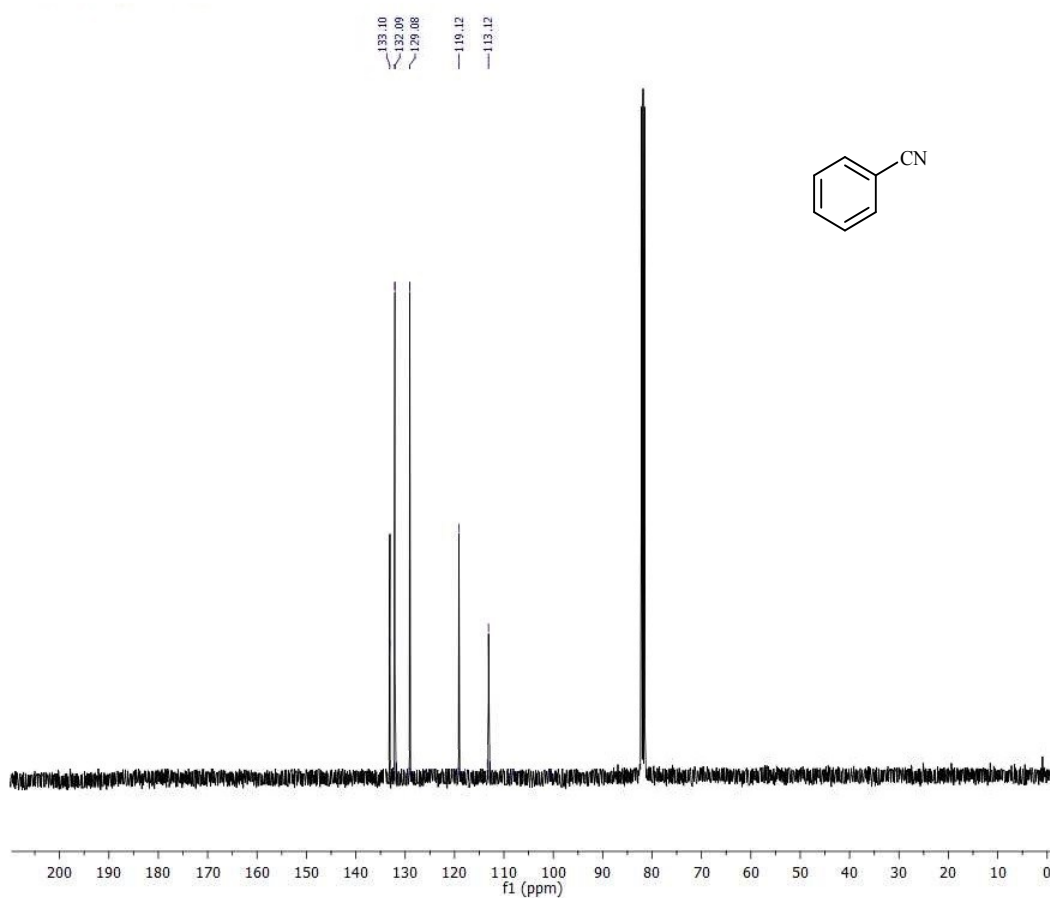

| Parameter                 | Value                          |
|---------------------------|--------------------------------|
| 1 Data File Name          | C:/Users/MADHAVI/benzal/11/fid |
| 2 Title                   | Dec22-2015                     |
| 3 Comment                 | BA-BZ                          |
| 4 Origin                  | Bruker BioSpin GmbH            |
| 5 Owner                   | nmrsu                          |
| 6 Site                    |                                |
| 7 Spectrometer            | spect                          |
| 8 Author                  |                                |
| 9 Solvent                 | CDCl3                          |
| 10 Temperature            | 292.6                          |
| 11 Pulse Sequence         | zgpg30                         |
| 12 Number of Scans        | 214                            |
| 13 Receiver Gain          | 199                            |
| 14 Relaxation Delay       | 2.0000                         |
| 15 Pulse Width            | 9.8000                         |
| 16 Acquisition Time       | 1.3631                         |
| 17 Acquisition Date       | 2015-12-22T14:59:00            |
| 18 Modification Date      | 2015-12-22T10:38:12            |
| 19 Spectrometer Frequency | 100.61                         |
| 20 Spectral Width         | 24038.5                        |
| 21 Lowest Frequency       | -1958.9                        |
| 22 Nucleus                | 13C                            |
| 23 Acquired Size          | 32768                          |
| 24 Spectral Size          | 65536                          |

# <sup>1</sup>H spectrum of 2c

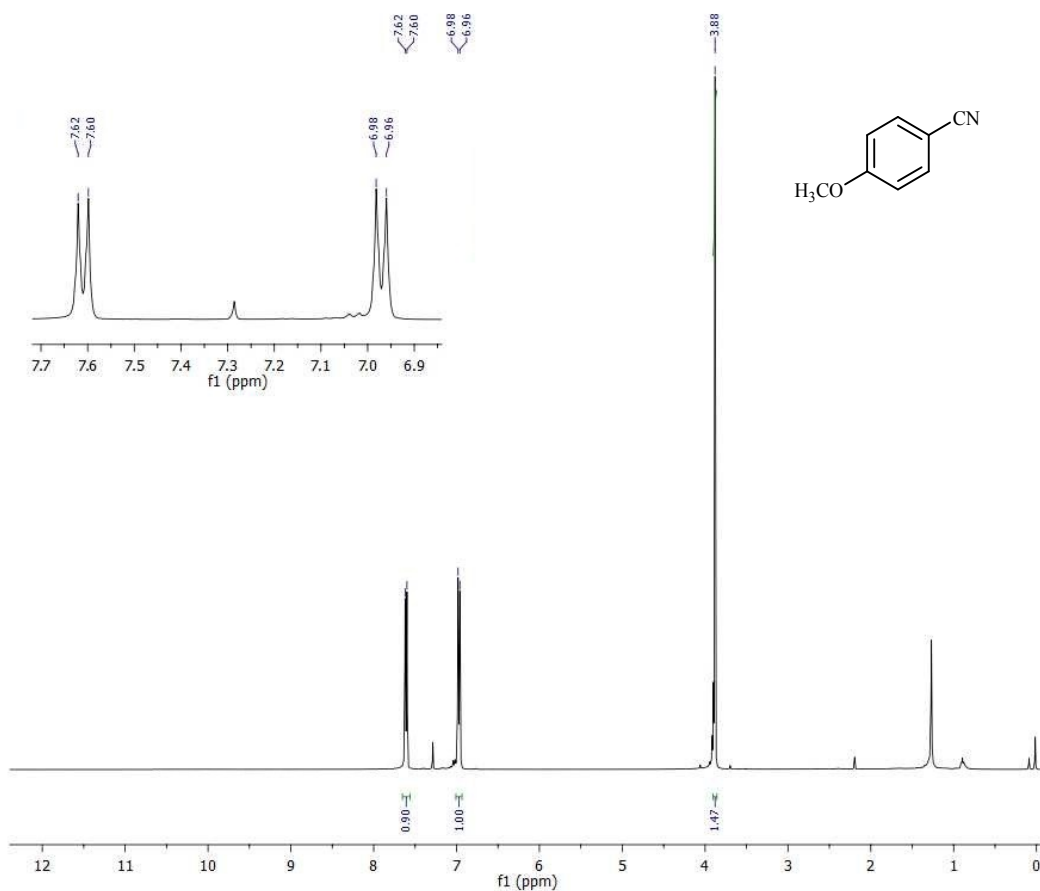

| Parameter                 | Value                   |
|---------------------------|-------------------------|
| 1 Data File Name          | C:/Users/MADHAVI/20/fid |
| 2 Title                   | Mar24-2015              |
| 3 Comment                 | 1H                      |
| 4 Origin                  | Bruker BioSpin GmbH     |
| 5 Owner                   | nmrsu                   |
| 6 Site                    |                         |
| 7 Spectrometer            | spect                   |
| 8 Author                  |                         |
| 9 Solvent                 | CDCl <sub>3</sub>       |
| 10 Temperature            | 291.2                   |
| 11 Pulse Sequence         | zg30                    |
| 12 Number of Scans        | 16                      |
| 13 Receiver Gain          | 114                     |
| 14 Relaxation Delay       | 1.0000                  |
| 15 Pulse Width            | 15.0000                 |
| 16 Acquisition Time       | 4.0894                  |
| 17 Acquisition Date       | 2015-03-24T16:06:00     |
| 18 Modification Date      | 2015-03-24T11:36:40     |
| 19 Spectrometer Frequency | 400.13                  |
| 20 Spectral Width         | 8012.8                  |
| 21 Lowest Frequency       | -1535.4                 |
| 22 Nucleus                | 1H                      |
| 23 Acquired Size          | 32768                   |
| 24 Spectral Size          | 65536                   |

# <sup>13</sup>C spectrum of 2c

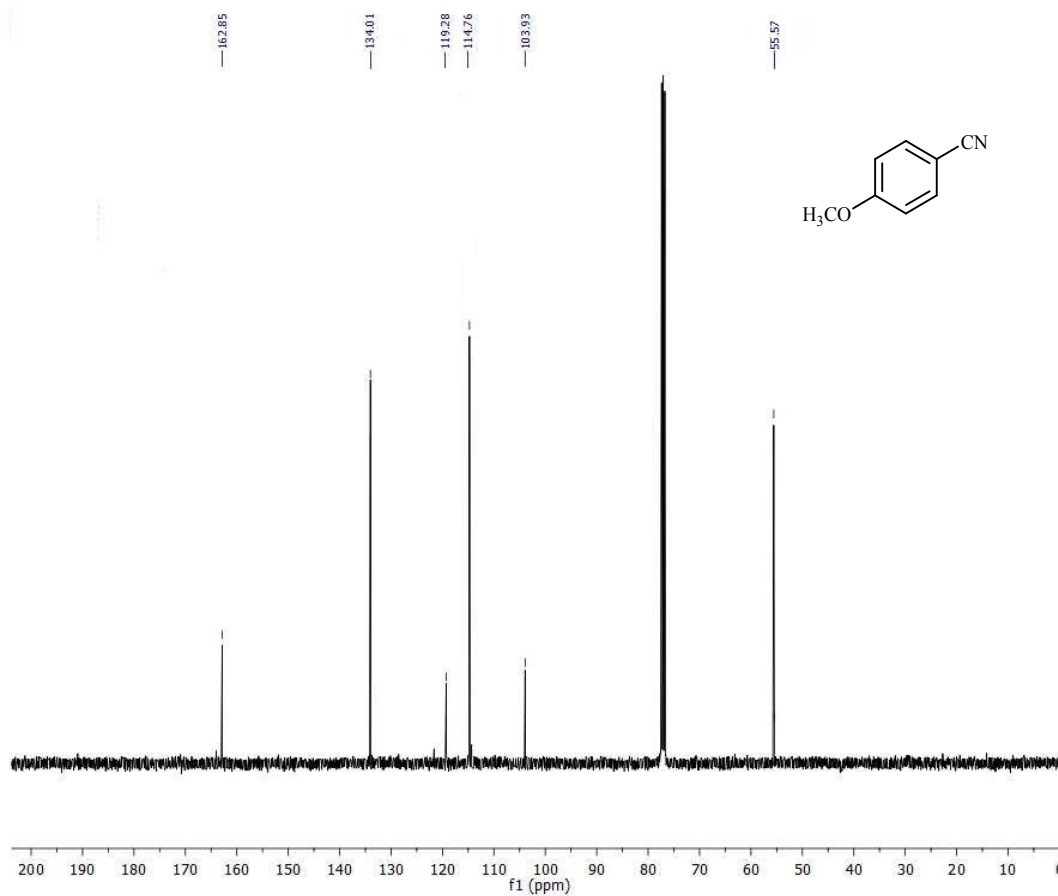

| Parameter                 | Value                   |
|---------------------------|-------------------------|
| 1 Data File Name          | C:/Users/MADHAVI/21/fid |
| 2 Title                   | Mar24-2015              |
| 3 Comment                 | <sup>13</sup> C         |
| 4 Origin                  | Bruker BioSpin GmbH     |
| 5 Owner                   | nmrsu                   |
| 6 Site                    |                         |
| 7 Spectrometer            | spect                   |
| 8 Author                  |                         |
| 9 Solvent                 | CDCl3                   |
| 10 Temperature            | 291.9                   |
| 11 Pulse Sequence         | zgpg30                  |
| 12 Number of Scans        | 353                     |
| 13 Receiver Gain          | 199                     |
| 14 Relaxation Delay       | 2.0000                  |
| 15 Pulse Width            | 9.8000                  |
| 16 Acquisition Time       | 1.3631                  |
| 17 Acquisition Date       | 2015-03-24T16:12:00     |
| 18 Modification Date      | 2015-03-24T11:57:36     |
| 19 Spectrometer Frequency | 100.61                  |
| 20 Spectral Width         | 24038.5                 |
| 21 Lowest Frequency       | -1958.9                 |
| 22 Nucleus                | <sup>13</sup> C         |
| 23 Acquired Size          | 32768                   |
| 24 Spectral Size          | 65536                   |

# <sup>1</sup>H spectrum of 2d

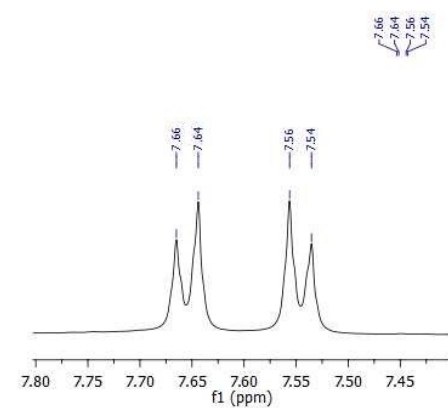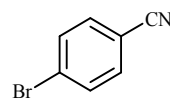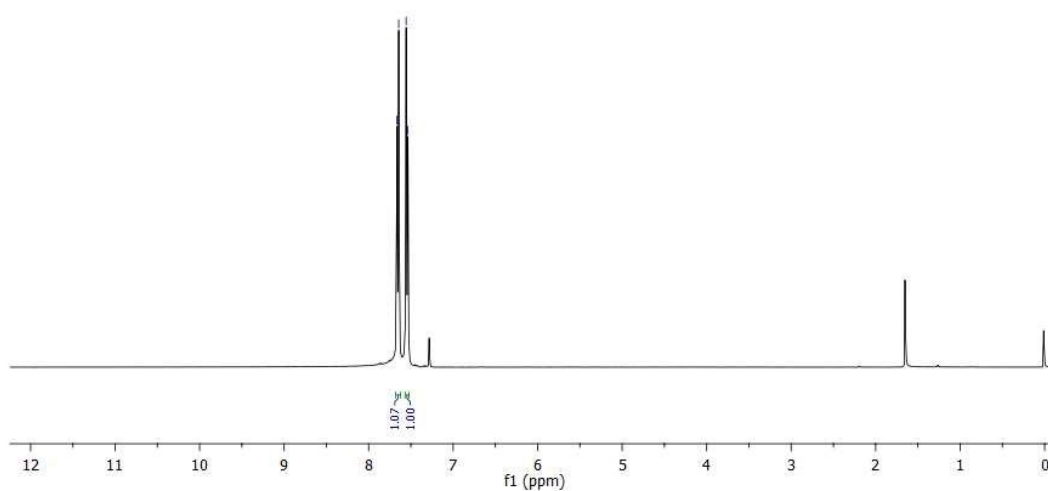

| Parameter                 | Value                        |
|---------------------------|------------------------------|
| 1 Data File Name          | C:/Users/MADHAVI/1/fid       |
| 2 Title                   | Nitile series-P-bromo benzal |
| 3 Comment                 | P-BR-CN                      |
| 4 Origin                  | Bruker BioSpin GmbH          |
| 5 Owner                   | nmrsu                        |
| 6 Site                    |                              |
| 7 Spectrometer            | spect                        |
| 8 Author                  |                              |
| 9 Solvent                 | CDCl3                        |
| 10 Temperature            | 0.0                          |
| 11 Pulse Sequence         | zg30                         |
| 12 Number of Scans        | 16                           |
| 13 Receiver Gain          | 178                          |
| 14 Relaxation Delay       | 1.0000                       |
| 15 Pulse Width            | 15.0000                      |
| 16 Acquisition Time       | 4.0894                       |
| 17 Acquisition Date       | 2015-07-03T11:16:35          |
| 18 Modification Date      | 2015-07-03T11:16:36          |
| 19 Spectrometer Frequency | 400.13                       |
| 20 Spectral Width         | 8012.8                       |
| 21 Lowest Frequency       | -1535.4                      |
| 22 Nucleus                | <sup>1</sup> H               |
| 23 Acquired Size          | 32768                        |
| 24 Spectral Size          | 65536                        |



# <sup>13</sup>C spectrum of 2d

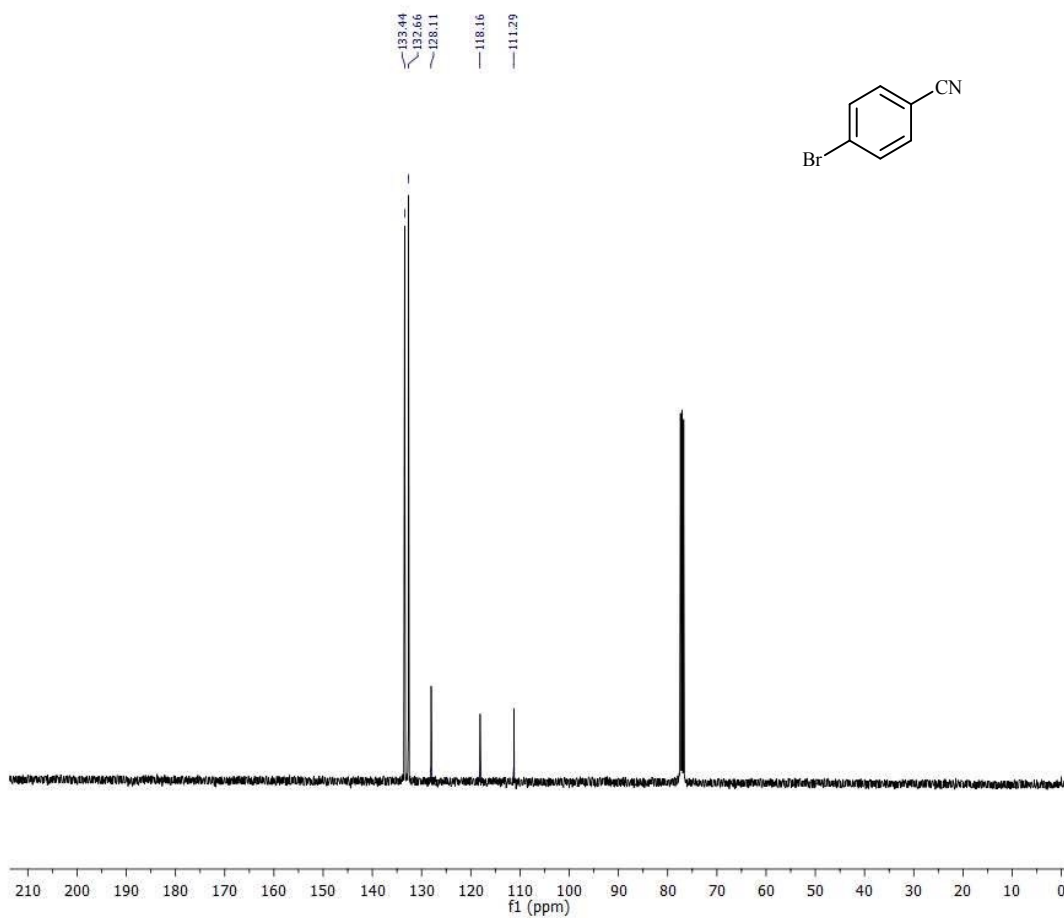

| Parameter                 | Value                        |
|---------------------------|------------------------------|
| 1 Data File Name          | C:/Users/MADHAVI/2/fid       |
| 2 Title                   | Nitile series-P-bromo benzal |
| 3 Comment                 | P-BR-CN                      |
| 4 Origin                  | Bruker BioSpin GmbH          |
| 5 Owner                   | nmrsu                        |
| 6 Site                    |                              |
| 7 Spectrometer            | spect                        |
| 8 Author                  |                              |
| 9 Solvent                 | CDCl3                        |
| 10 Temperature            | 0.0                          |
| 11 Pulse Sequence         | zgpg30                       |
| 12 Number of Scans        | 1002                         |
| 13 Receiver Gain          | 199                          |
| 14 Relaxation Delay       | 2.0000                       |
| 15 Pulse Width            | 9.8000                       |
| 16 Acquisition Time       | 1.3631                       |
| 17 Acquisition Date       | 2015-07-03T12:15:16          |
| 18 Modification Date      | 2015-07-03T12:15:18          |
| 19 Spectrometer Frequency | 100.61                       |
| 20 Spectral Width         | 24038.5                      |
| 21 Lowest Frequency       | -1958.9                      |
| 22 Nucleus                | 13C                          |
| 23 Acquired Size          | 32768                        |
| 24 Spectral Size          | 65536                        |

# <sup>1</sup>H spectrum of 2g

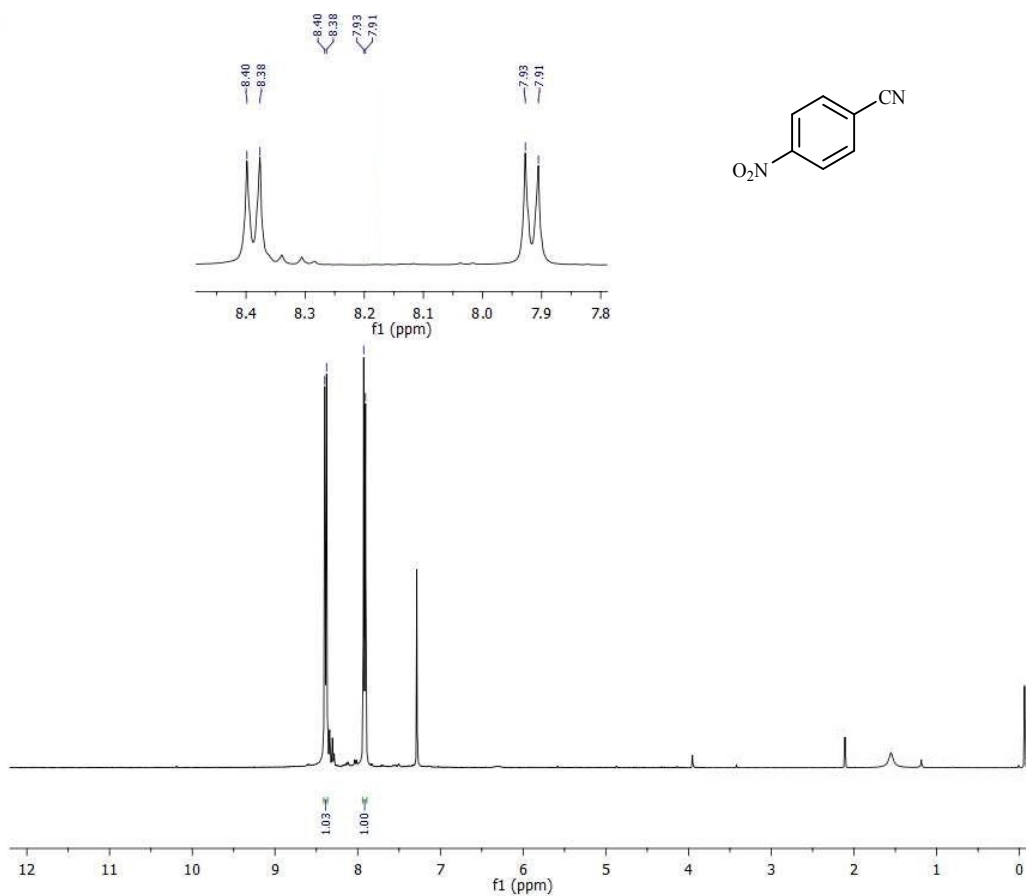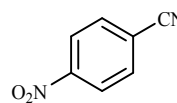

| Parameter                 | Value                   |
|---------------------------|-------------------------|
| 1 Data File Name          | C:/Users/MADHAVI/4/ fid |
| 2 Title                   | Dec17-2014              |
| 3 Comment                 | PNO2                    |
| 4 Origin                  | Bruker BioSpin GmbH     |
| 5 Owner                   | nmrsu                   |
| 6 Site                    |                         |
| 7 Spectrometer            | spect                   |
| 8 Author                  |                         |
| 9 Solvent                 | CDCl3                   |
| 10 Temperature            | 292.9                   |
| 11 Pulse Sequence         | zg30                    |
| 12 Number of Scans        | 16                      |
| 13 Receiver Gain          | 199                     |
| 14 Relaxation Delay       | 1.0000                  |
| 15 Pulse Width            | 15.0000                 |
| 16 Acquisition Time       | 4.0894                  |
| 17 Acquisition Date       | 2014-12-17T12:55:00     |
| 18 Modification Date      | 2014-12-17T08:26:38     |
| 19 Spectrometer Frequency | 400.13                  |
| 20 Spectral Width         | 8012.8                  |
| 21 Lowest Frequency       | -1535.4                 |
| 22 Nucleus                | <sup>1</sup> H          |
| 23 Acquired Size          | 32768                   |
| 24 Spectral Size          | 65536                   |

# <sup>13</sup>C spectrum of 2g

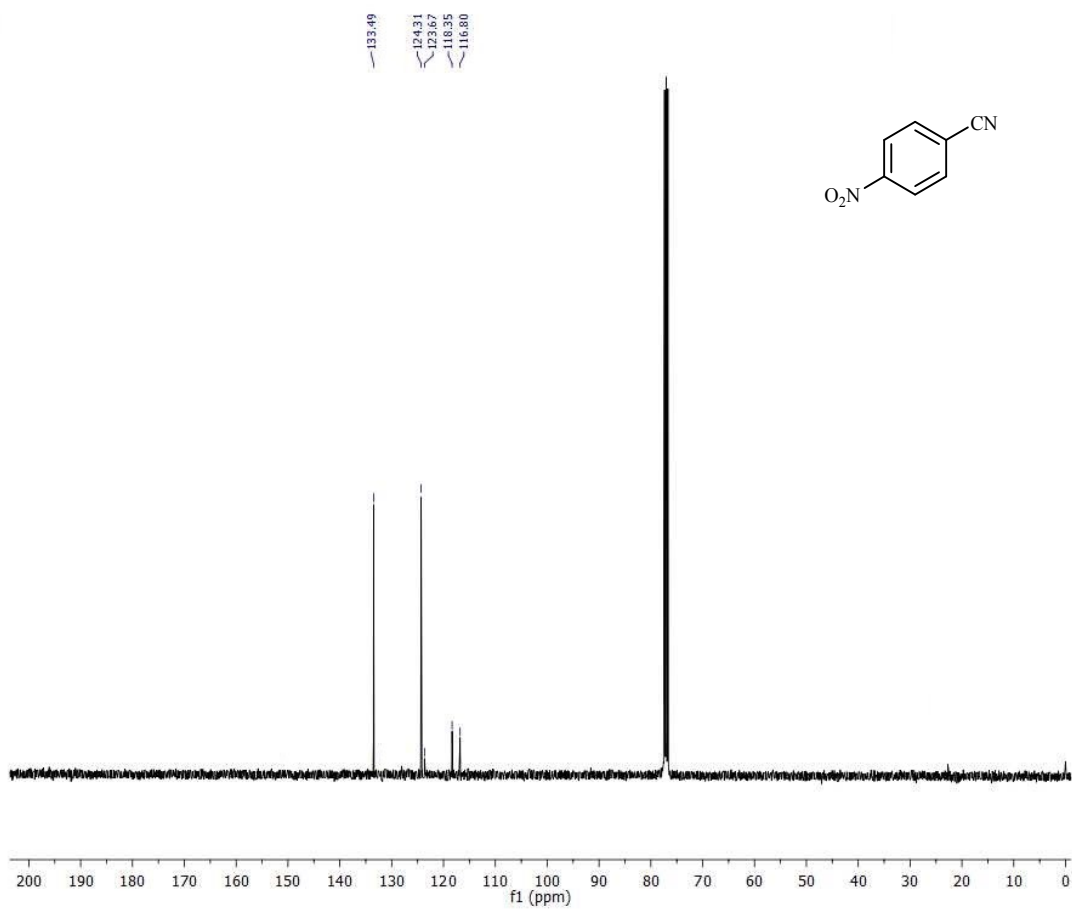

| Parameter                 | Value                          |
|---------------------------|--------------------------------|
| 1 Data File Name          | C:/Users/MADHAVI/Desktop/5/fid |
| 2 Title                   | Dec17-2014                     |
| 3 Comment                 | 13C                            |
| 4 Origin                  | Bruker BioSpin GmbH            |
| 5 Owner                   | nmrsu                          |
| 6 Site                    |                                |
| 7 Spectrometer            | spect                          |
| 8 Author                  |                                |
| 9 Solvent                 | CDCl3                          |
| 10 Temperature            | 294.4                          |
| 11 Pulse Sequence         | zgpg30                         |
| 12 Number of Scans        | 802                            |
| 13 Receiver Gain          | 199                            |
| 14 Relaxation Delay       | 2.0000                         |
| 15 Pulse Width            | 9.8000                         |
| 16 Acquisition Time       | 1.3631                         |
| 17 Acquisition Date       | 2014-12-17T13:42:00            |
| 18 Modification Date      | 2014-12-17T09:13:14            |
| 19 Spectrometer Frequency | 100.61                         |
| 20 Spectral Width         | 24038.5                        |
| 21 Lowest Frequency       | -1958.9                        |
| 22 Nucleus                | 13C                            |
| 23 Acquired Size          | 32768                          |
| 24 Spectral Size          | 65536                          |

# <sup>1</sup>H spectrum of 2i

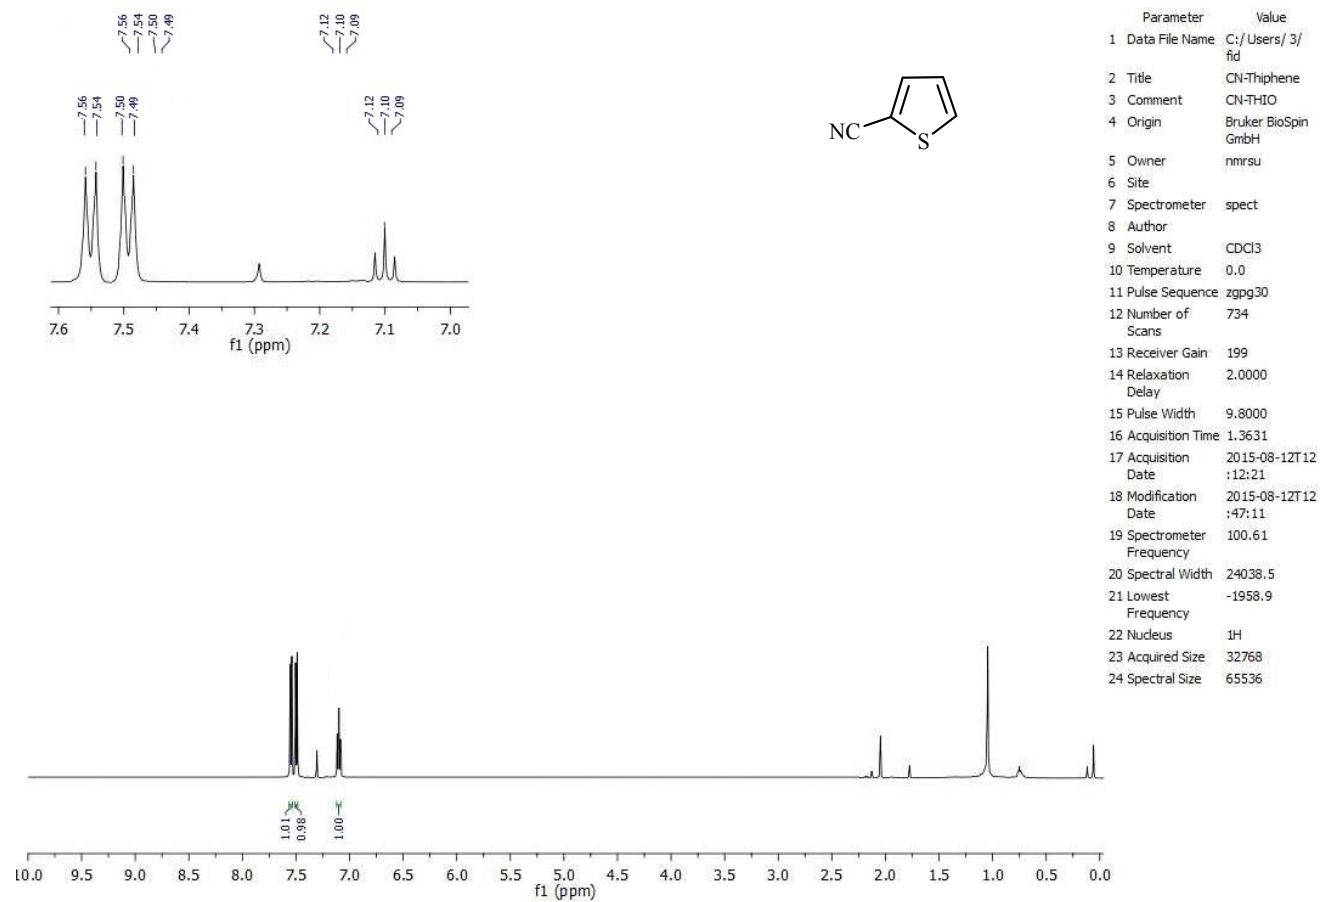

# <sup>13</sup>C spectrum of 2i

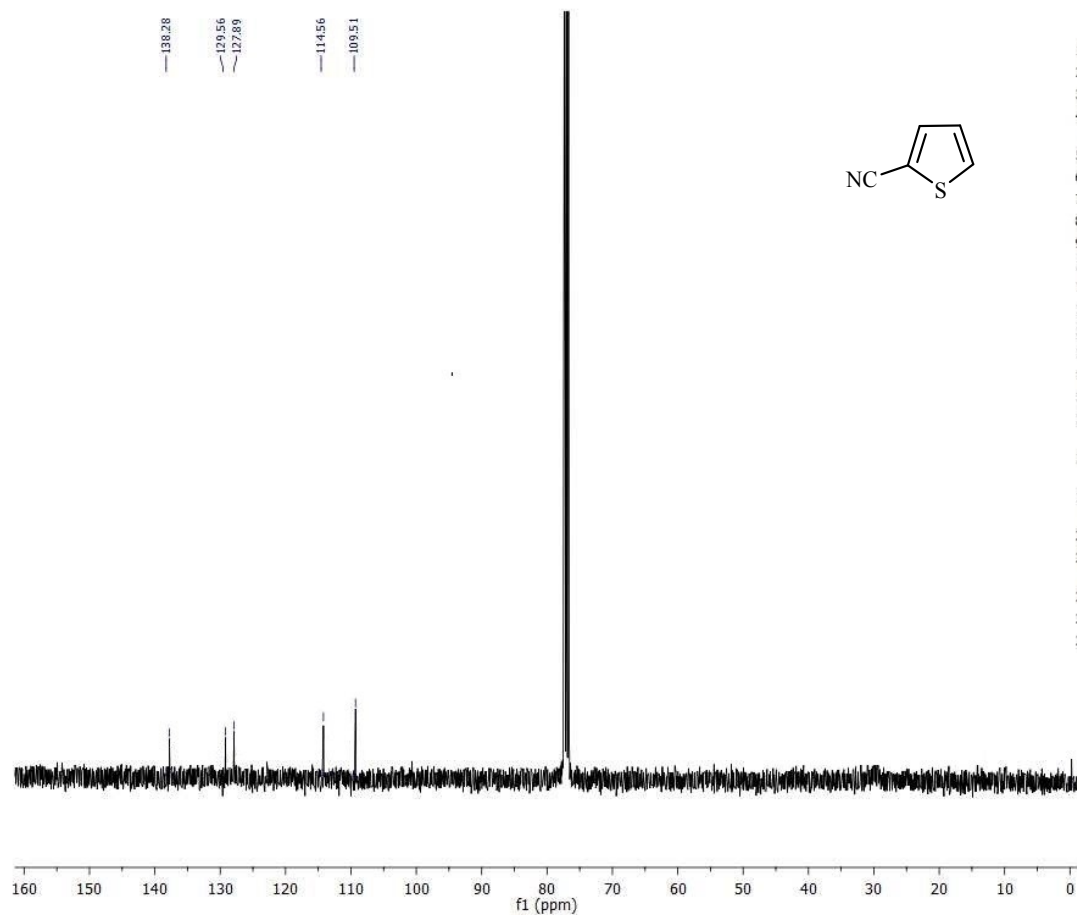

| Parameter                 | Value               |
|---------------------------|---------------------|
| 1 Data File Name          | C:/Users/2/ fid     |
| 2 Title                   | CN-Thiophene        |
| 3 Comment                 | CN-THIO             |
| 4 Origin                  | Bruker BioSpin GmbH |
| 5 Owner                   | nmrsu               |
| 6 Site                    |                     |
| 7 Spectrometer            | spect               |
| 8 Author                  |                     |
| 9 Solvent                 | CDCl3               |
| 10 Temperature            | 0.0                 |
| 11 Pulse Sequence         | zgpg30              |
| 12 Number of Scans        | 734                 |
| 13 Receiver Gain          | 199                 |
| 14 Relaxation Delay       | 2.0000              |
| 15 Pulse Width            | 9.8000              |
| 16 Acquisition Time       | 1.3631              |
| 17 Acquisition Date       | 2015-08-12T12:12:21 |
| 18 Modification Date      | 2015-08-12T12:47:11 |
| 19 Spectrometer Frequency | 100.61              |
| 20 Spectral Width         | 24038.5             |
| 21 Lowest Frequency       | -1958.9             |
| 22 Nucleus                | 13C                 |
| 23 Acquired Size          | 32768               |
| 24 Spectral Size          | 65536               |

## 5. References

1. X. He, Y. Shang, Zhiyu Yu, M. Fang, Y. Zhou, G. Han and F. Wu, *J. Org. Chem.*, 2014, **79**, 8882.
2. D. N. K. Reddy, K. B. Chandrasekhar, Y. S. S. Ganesh, B. S. Kumar, R. Adepu and M. Pal, *Tetrahedron Lett.*, 2015, **56**, 4586.
3. C. Tao, F. Liu, Y. Zhu, W. Liu and Z. Cao, *Org. Biomol. Chem.*, 2013, **11**, 3349.
4. S. Enthaler, *Eur. J. Org. Chem.*, 2011, 4760.
5. *Aldrich Advancing Science Handbook of Fine Chemicals*, 2015.
6. F. Drouet, P. Fontaine, G. Masson and J. Zhu, *Synthesis*, 2009, 1370.
7. C. S. Rao, M. Rambabu and P. S. Srinivasan, *Synth. Commun.*, 1989, **19**, 1431.
